# Supplementary material for: Enhancing tumor-specific recognition of programmable synthetic bacterial consortium for precision therapy of colorectal cancer
Source: PubMed Central journal article supplement (PMC10799920; doi:10.1038/s41522-024-00479-8), 2024-01-20
Supplement: 41522_2024_479_MOESM1_ESM.pdf [file 41522_2024_479_MOESM1_ESM.pdf]

1 **Supplemental materials for**  
2 **Enhancing Tumor-Specific Recognition of Programmable Synthetic**  
3 **Bacterial Consortium for Precision Therapy of Colorectal Cancer**

4 Tuoyu Zhou<sup>1#</sup>, Jingyuan Wu<sup>2#</sup>, Haibo Tang<sup>1</sup>, Dali Liu<sup>4</sup>, Byong-Hun Jeon<sup>5</sup>, Weilin Jin<sup>6</sup>,  
5 Yiqing Wang<sup>2</sup>, Yuanzhang Zheng<sup>7</sup>, Aman Khan<sup>1</sup>, Huawen Han<sup>3\*</sup>, Xiangkai Li<sup>1\*</sup>

6 1. Ministry of Education Key Laboratory of Cell Activities and Stress  
7 Adaptations, School of Life Sciences, Lanzhou University, Lanzhou, China

8 2. Gansu Province Key Laboratory Biotherapy and Regenerative Medicine, The  
9 First Hospital of Lanzhou University, Lanzhou, China

10 3. State Key Laboratory of Grassland Agro-ecosystems, College of Pastoral  
11 Agricultural Science and Technology, Lanzhou University, Lanzhou, China

12 4. Department of Chemistry and Biochemistry, Loyola University Chicago,  
13 Chicago, Illinois, USA

14 5. Department of Earth Resources and Environmental Engineering, Hanyang  
15 University, Seoul, Korea

16 6. Medical Frontier Innovation Research Center, The First Hospital of Lanzhou  
17 University, Lanzhou, China

18 7. Discovery Biology, Curia Golbal Inc., New York, USA

19 # These authors contributed equally to this work: Tuoyu Zhou, Jingyuan Wu.

20 **\*Corresponding author:**

21 **Prof. Xiangkai Li**

22 E-mail: xkli@lzu.edu.cn;

23 **Prof. Huawen Han**

24 E-mail: hanhuawen@lzu.edu.cn.

25 **This file includes:**

26 **I. Supplementary Methods**

27 *1. Molecular biology*

28 *2. Modeling*

29 *3. Biomarker analysis*

30 *4. Absolute quantitative analysis*

31 *5. Quantitation of gene expression*

32 *6. Protein expression analysis*

33 **II. Supplemental Figures**

34 Supplemental Figure 1 to 36

35 **III. Supplemental Tables**

36 Supplemental Table 1 to 6

37 **IV. Supplementary References**

38

39 **I. Supplementary Methods**

40 *1. Molecular biology*

41 The encoded information of all encoded genes or functional DNA fragments were  
42 obtained from NCBI (<https://www.ncbi.nlm.nih.gov/>), iGEM Standard Biology Parts  
43 (<https://parts.igem.org/>) and BioCyc databases (<https://biocyc.org/>). In particular, the  
44 related DNA sequences of amplifying genetic logic gates were reported and annotated  
45 in previous study [1](#). The DNA sequences were amplified from *E. coli* DH5 $\alpha$  genomic  
46 DNA, plasmid pGEN-*lux*CDABE (P8781, MiaoLing, China), or synthesized by  
47 Genewiz (China) and Twist (USA, 2022 iGEM sponsor). mRFP was stored and  
48 provided in lab. All recombinant plasmids were based on pSB1A3 or pSB4C5  
49 backbones (**Supplemental Figure 1**). pSB1A3 carries ampicillin resistant gene and a  
50 high copy replicon ColE1, while pSB4C5 carries chloramphenicol resistant gene and a  
51 low copy replicon pSC101. Amplified primers were synthesized by GENERAL Biol  
52 (Anhui, China). All recombinant plasmids were constructed using one-step cloning kit  
53 (C113, Vazyme, China) or Blunt Kination ligation kit (6127A, Takara, Japan)  
54 (**Supplemental Table 2**). All constructed plasmids were first transformed into *E. coli*  
55 DH5 $\alpha$  for preservation and amplification, verified by DNA sequencing (Tsingke,  
56 China), and then transformed into EcN. Full information of programmable strains can

57 be obtained in **Supplemental Table 3** and bacteria member of synthetic consortia is  
58 listed in **Supplemental Table 4**.

## 59 **2. Modeling**

60 To describe the behavior of biosensors, we developed an ordinary differential equation  
61 describing normalized mRFP fluorescence (mRFP/cell) ( $y$ ) generation in response to  
62 ambient lactate concentration ( $L$ , equation (1)), protons ( $H^+$ , equation (2)), and oxygen  
63 level ( $O_2$ , equation (3)) via XOR Switch, regulated by transcription factors LldR [2](#),  
64 CadC [3](#) and FNR [4](#). For simplicity, the timescale for binding and transcription reactions  
65 is assumed much faster than that for translation [5:6](#). Bacterial growth is modelled using  
66 the logistic equation with  $N_{max}$  as the maximum population size,  $\beta_N$  is the  
67 degradation rate and  $r_0$  is the growth rate (equation (4)) [7](#). The relationship between  
68 bacteria degradation rate ( $\beta_N$ ) and lysis protein ( $L_p$ ) can be defined as hill equation  
69 (assumed hill coefficient is 1) (equation 5) [8](#). Since  $\phi X174E$  is placed downstream of  
70 pLldR, pCadC, and pPepT, the lysis proteins concentration ( $L_p$ ) is induced by ambient  
71 lactate (equation (6)),  $H^+$  (equation (7)), and oxygen (equation (8)). According to  
72 equations (4) and (5), the time-dependent changes of the population of lactate (equation  
73 (9)), pH (equation (10)) and hypoxia (equation (11)) induced lysis biosensors were  
74 described. As mRFP production depends on both bacterial population and inducing  
75 signals, we can derive a formula to describe the expression of mRFP ( $y$ ) in lactate  
76 induced lysis biosensors (equation (12)). Additionally, we also presented equations to  
77 describe the mRFP production in pH (equation (13)) and hypoxia (equation (14))  
78 induced lysis biosensors. Parameter fitting was based on the dataset collected in  
79 experiments. Initial values for parameters were set using reported values [8:9](#), and  
80 optimization of parameters was performed using the least squares analysis based on the  
81 Levenberg-Marquardt algorithm (least\_squares function, Scipy.optimize library).  
82 Specifically, a residual function,  $r = y_{measured\ data} - y_{prediction}$ , was defined to calculate the  
83 differences between model predictions and actual measurement data given the model  
84 parameters. Iterative adjustments were made to minimize the sum of squared residuals  
85 ( $SSE = \sum r^2$ ) to ensure convergence of the fitting process.

86

$$\frac{d_y}{d_t} = \frac{\alpha_y K_s}{1 + K_s + \left(\frac{K_1}{1 + K_L L}\right)} - \beta_y y \quad (1)$$

$$\frac{d_y}{d_t} = \frac{\alpha_y K_s}{1 + K_s + \left(\frac{K_H + \frac{1}{H^+}}{K_H K_2}\right)} - \beta_y y \quad (2)$$

$$\frac{d_y}{d_t} = \frac{\alpha_y K_s}{1 + K_s + \left(\frac{K_{O_2} O_2 + 1}{K_3}\right)} - \beta_y y \quad (3)$$

$$\frac{d_N}{d_t} = r_0(N_{max} - N)N - \beta_N N \quad (4)$$

$$\beta_N = \frac{K_\gamma}{1 + \frac{L_0}{L_p}} \quad (5)$$

$$L_p = \frac{\alpha_y}{1 + \left(\frac{K_1}{1 + K_L L}\right)} \quad (6)$$

$$L_p = \frac{\alpha_y}{1 + \frac{K_H + \frac{1}{H^+}}{K_H K_2}} \quad (7)$$

$$L_p = \frac{\alpha_y}{1 + \frac{1 + K_{O_2} O_2}{K_3}} \quad (8)$$

$$\frac{d_N}{d_t} = r_0(N_{max} - N)N - \frac{\alpha_y K_\gamma}{L_0 + \alpha_y + \left(\frac{K_1 L_0}{1 + K_L L}\right)} N \quad (9)$$

$$\frac{d_N}{d_t} = r_0(N_{max} - N)N - \frac{\alpha_y K_\gamma}{\alpha_y + L_0 + L_0 \left(\frac{K_H + \frac{1}{H^+}}{K_H K_2}\right)} N \quad (10)$$

$$\frac{d_N}{d_t} = r_0(N_{max} - N)N - \frac{\alpha_y K_\gamma}{\alpha_y + L_0 + L_0 \left(\frac{1 + K_{O_2} O_2}{K_3}\right)} N \quad (11)$$

$$\frac{d_y}{d_t} = \frac{\alpha_y K_s}{1 + K_s + \left(\frac{K_1}{1 + K_L L}\right)} N - \beta_y y \quad (12)$$

$$\frac{d_y}{d_t} = \frac{\alpha_y K_s}{1 + K_s + \left(\frac{K_H + \frac{1}{H^+}}{K_H K_2}\right)} N - \beta_y y \quad (13)$$

99



$$\frac{d_y}{d_t} = \frac{\alpha_y K_s}{1 + K_s + \left(\frac{K_{O_2} O_2 + 1}{K_3}\right)} N - \beta_y y \quad (14)$$

### 101 **Model parameters**

102  $\alpha_y$  (production rate), 6.5-140;  $\beta_y$  (degradation rate), 1;  $K_s$  (TP901 binding affinity to  
 103 XOR gate), 10;  $K_1$  (LldR dimer binding affinity to pLldR promoter), 120;  $K_L$   
 104 (Lactate binding affinity to LldR dimer), 10;  $K_2$  (CadC binding affinity to pCadC  
 105 promoter), 200;  $K_H$  ( $H^+$  interaction with CadC transcription activator), 250;  $K_3$  (FNR  
 106 dimer binding affinity to pPepT promoter), 20.  $K_{O_2}$  ( $O_2$  binding affinity to FNR dimer),  
 107 50.  $N_{max}$  (maximum population), 10;  $r_0$  (nature growth rate), 0.5;  $K_Y$  (maximum  
 108 lysis rate), 4.70-5.02;  $L_0$  (lysis protein concentration at half the maximum lysis rate),  
 109 0.03-30.

### 110 **3. Biomarker analysis**

111 Serum samples were thawed in ice from -80 °C. Frozen colon tissues were weighed and  
 112 soaked in ice-cold sterile PBS in proportion (1: 9, w/v), then homogenized using  
 113 automatic tissue dissociator (Tissuelyser-24L, Jingxin, Shanghai, China) and  
 114 centrifuged at 5000 g for 5 min to collect supernatant. Then, serum lipopolysaccharides  
 115 (LPS; F2631, FANKEWEI, China), colon inflammatory cytokines (tumor necrosis  
 116 factor-alpha (TNF- $\alpha$ ), interleukin-1 $\beta$  (IL-1 $\beta$ ), interleukin-6 (IL-6); Shanghai Enzyme-  
 117 linked Biotechnology, China) and apoptosis biomarkers (P53, B-cell lymphoma 2 (Bcl-  
 118 2), Bal-2 associated X protein (BAX); Shanghai Enzyme-linked Biotechnology, China)  
 119 were measured using corresponding commercial kits. The total protein concentration in  
 120 the homogenate supernatant was determined using a Bradford Protein Assay Kit  
 121 (Beyotime, China, P0006). Absorbance was detected using Multiskan GO equipped  
 122 with SkanIt Software 4.1 (Thermo Fisher Scientific, USA).

### 123 **4. Absolute quantitative analysis**

124 Briefly, stool DNA was extracted using the TIANamp fecal DNA Kit (Tiagen  
 125 Biotechnology, China). Then, real-time quantitative PCR (qPCR) was performed on  
 126 DNA using specific primers for total bacteria, EcN and recombinant strains. All qPCR

127 primer sequences are listed in **Supplemental Table 5**. The target DNA sequences were  
128 cloned to pMD-18T (Takara) and the recombinant plasmid was employed to establish  
129 qPCR standard curve. qPCR was performed on QuantStudio 5 (Applied Biosystems,  
130 USA) using TB Green Premix Ex Taq II (RR820, Takara). The gene copy numbers  
131 were calculated. All measurements were repeated three times.

### 132 ***5. Quantitation of gene expression***

133 Total RNA from the colon tissue was extracted from individual homogenates with the  
134 RNAPrep Pure Tissue Kit (DP431, TIANGEN Biotech) and reverse-transcribed into  
135 cDNA using the HiScript 1st Strand cDNA Synthesis kit (R111, Vazyme Biotech,  
136 China.). Then, a total of 100 ng of cDNA was mixed with TB Green Premix Ex Taq II  
137 (RR802, Takara) and quantitative reverse transcription PCR (qRT-PCR) was performed  
138 on QuantStudio 5 (Applied Biosystems, ThermoFisher, USA). The primer sequences  
139 of the target genes are listed in **Supplemental Table 6**. GAPDH gene was used as  
140 internal controls and the mRNA expression level of each gene was calculated using  
141  $2^{-\Delta\Delta C_t}$  method.

### 142 ***6. Protein expression analysis***

143 Through reverse PCR and BKL kit (Takara, Japan), 6 x His-Tag was introduced at the  
144 3' end of *hlyE*. The dual-vector systems containing sensing and therapeutic elements  
145 were constructed as described. In the subcutaneous tumor mouse model, tumor samples  
146 were obtained 12 hours after administering the engineered strains via intratumoral  
147 injection. The total proteins of tumor samples were extracted by homogenization with  
148 RIPA lysis buffer provided by Total protein extraction kit (W034-1-1, Nanjing  
149 Jiancheng Bioengineering Institute). After centrifugation at 12 000g for 15 min at 4 °C,  
150 the supernatants were collected, and the protein concentrations were determined by  
151 Bradford Protein Assay Kit (Beyotime). By 10% sodium dodecyl sulfate-  
152 polyacrylamide gel electrophoresis (SDS-PAGE), proteins were separated and  
153 transferred onto a PVDF membrane (Millipore, MA, USA). The membrane was then  
154 blocked with skimmed milk (5%; TBS-Tween) for 1 hours and incubated overnight at

155 4 °C with specific mouse primary antibody against His-Tag (66005-1, proteintech).  
 156 After washing 3 times with TBS-Tween (Beyotime, P0023C3), the membrane was  
 157 incubated with second antibody (HRP-conjugated Affinipure Goat Anti-Mouse IgG  
 158 (H+L), SA00001-1, proteintech) for 2 hours. The signals were visualized using the  
 159 BeyoECL Plus (Beyotime, P0018S) and pictured using Fusion FX 6 (Vilber Lourmat,  
 160 France).

161 **II. Supplemental Figures**

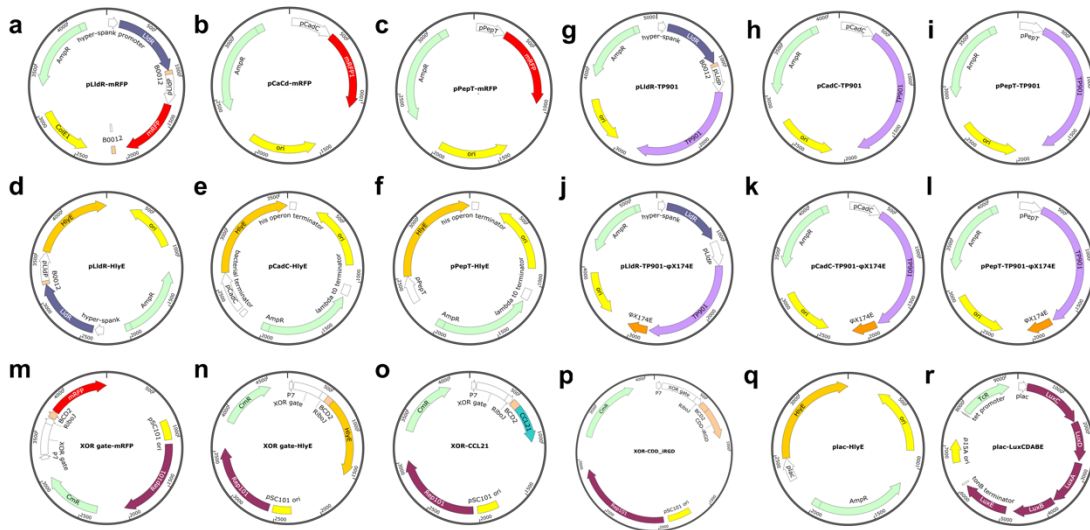

162  
 163 **Supplemental Figure 1. Maps of plasmids used in this study. a, pLldR-mRFP. b,**  
 164 **pCadC-mRFP. c, pPepT-mRFP. d, pLldR-HlyE. e, pCadC-HlyE. f, pPepT-HlyE. g,**  
 165 **pLldR-TP901. h, pCadC-TP901. i, pPepT-TP901. j, pLldR-TP901- $\phi$ X174E. k, pCadC-**  
 166 **TP901- $\phi$ X174E. l, pPepT-TP901- $\phi$ X174E. m, pP7-XOR gate-mRFP. n, pP7-XOR**  
 167 **gate-HlyE. o, pP7-XOR gate-CCL21. p, pP7-XOR gate-CDD\_iRGD. q, plac-HlyE. r,**  
 168 **plac-LuxCDABE. Among the labeled genetic elements, RiboJ is a ribozyme-based**  
 169 **insulator, which can buffer synthetic circuits from genetic context [10-11](#). Besides, as a**  
 170 **translation initial element, BCD2 can realize precise and reliable downstream gene**  
 171 **expression [12](#).**

172

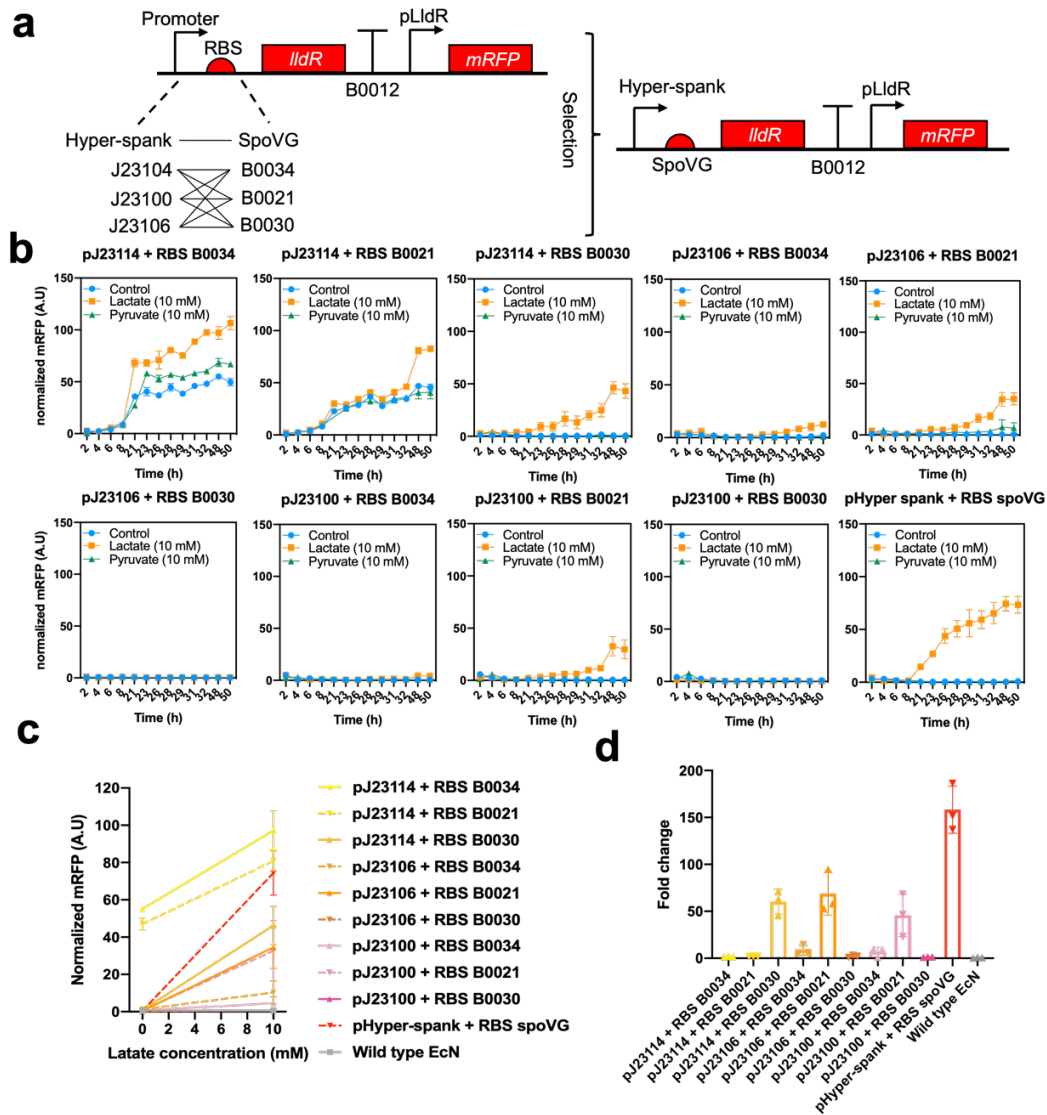

173

174 **Supplemental Figure 2. *In vitro* characterization of lactate biosensor variants. a,**

175 Lactate biosensor variants were constructed by generating a library of plasmids

176 containing various constitutive promoters driving lactate repressor and a lactate

177 promoter driving mRFP. These plasmids were then transformed into EcN strain,

178 resulting in 10 generated variants. **b,** Induction data from 10 different strains carrying

179 reporter plasmid variants showed mRFP expression levels (A.U) in 0 mM and 10 mM

180 lactate or pyruvate (n = 3, ± s.e.m). **c,** Induction data of 10 strains at 48 h. **d,** The fold-

181 change of the lactate activator was calculated as the ratio of mRFP fluorescence in

182 induced to non-induced states. The red dotted line in (c) represents the optimal strain

183 that matched our criteria of low basal expression and high fold change upon induction.

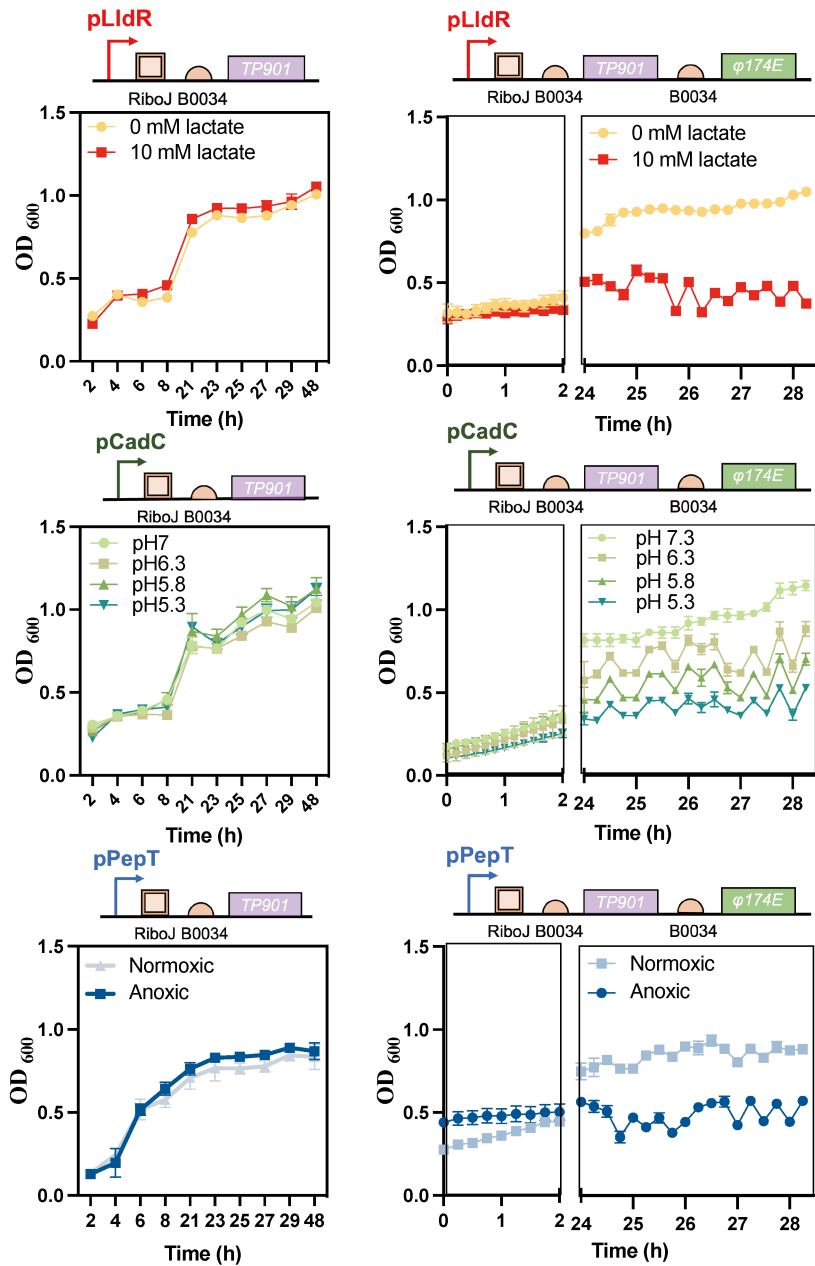

185

186 **Supplemental Figure 3. Bacterial growth characteristics of biosensor variants. a-**187 **f,** Up: circuit schematics of lactate, pH and hypoxia-induced biosensor strains. **a-f,**

188 Down: optical densities measurements of bacterial cultures after growth in

189 corresponding various concentrations of inducers. Bacterial colonies were grown at 37 °C

190 in LB medium. For reporter strains shown in **a-c,** bacteria were cultured for 48 h and191 OD<sub>600</sub> values were recorded every 1 h (n = 3, ± s.e.m). For reporters strains carrying192 lysis module (**d-f**), bacteria were cultured for 28 h and OD<sub>600</sub> values were recorded

193 every 5 min ( $n = 4, \pm$  s.e.m). Optical densities of the culture medium were subtracted  
194 from each measurement.  
195

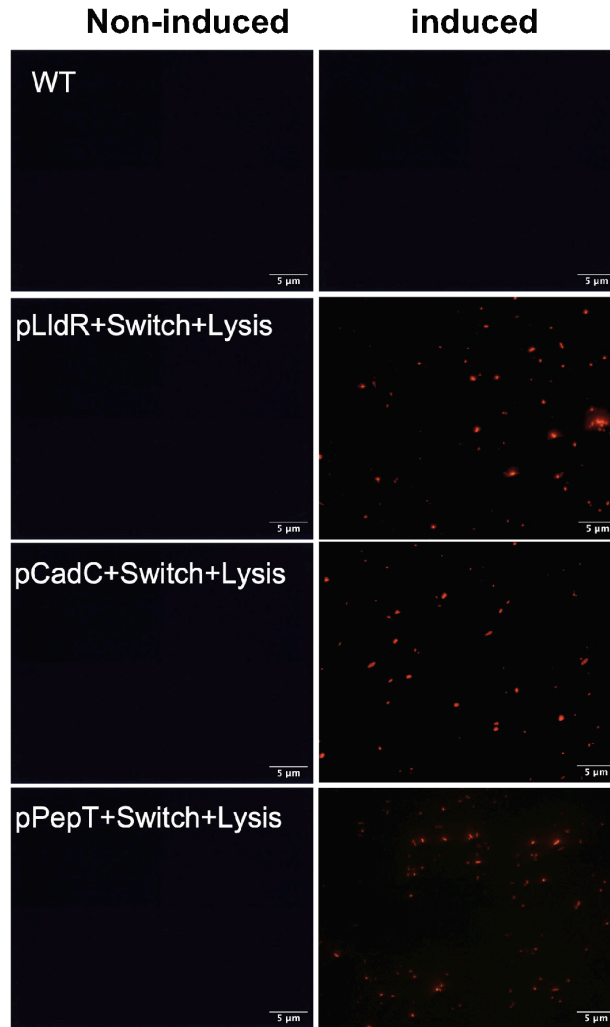

196  
197 **Supplemental Figure 4.** Representative fluorescence image of different lysis  
198 biosensors after growing at induced or non-induced states. Bacteria were cultured in  
199 LB medium for 12 h at 37 °C. The scale bar labeled in the lower right corner of the  
200 image represents 5  $\mu$ m.  
201

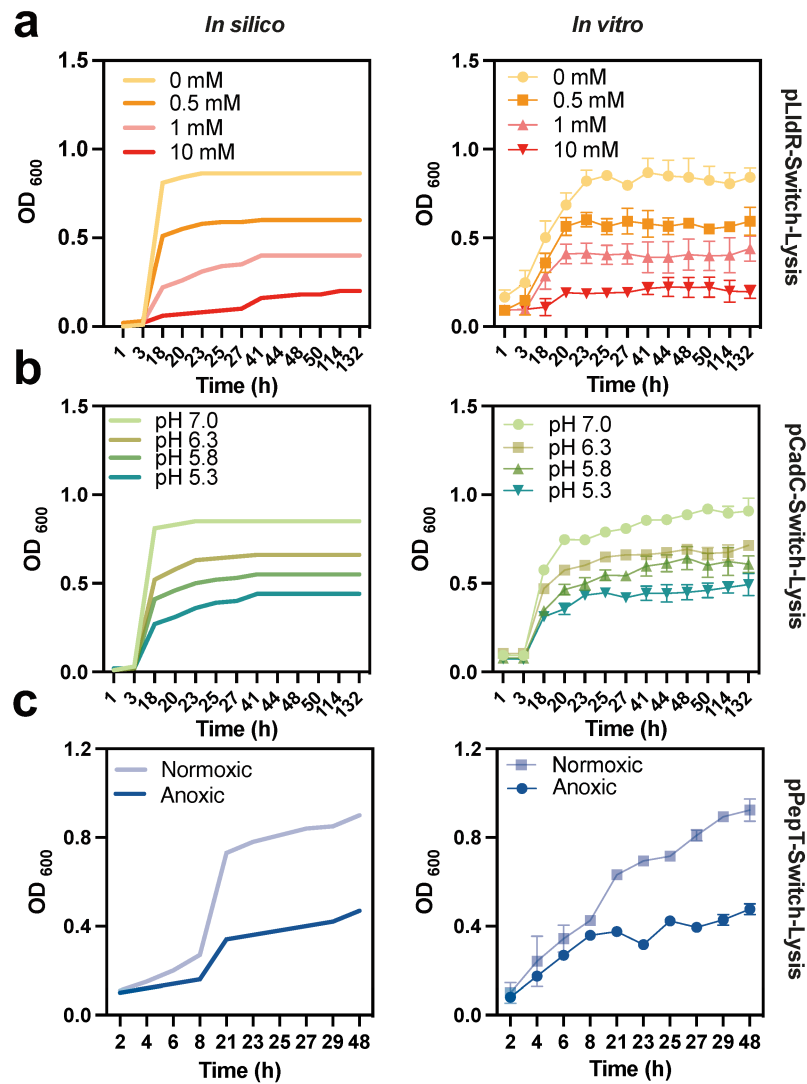

202

203 **Supplemental Figure 5. Computational modelling of bacterial growth curves of**

204 **lysis biosensors.** Bacteria population of lactate (a), pH (b) and anoxic (c) induced lysis

205 biosensors were modelled under varying environmental conditions. Modeling *in silico*

206 predictions (Left) compared to (right) *in vitro* experimental results (n = 3, ± s.e.m).

207

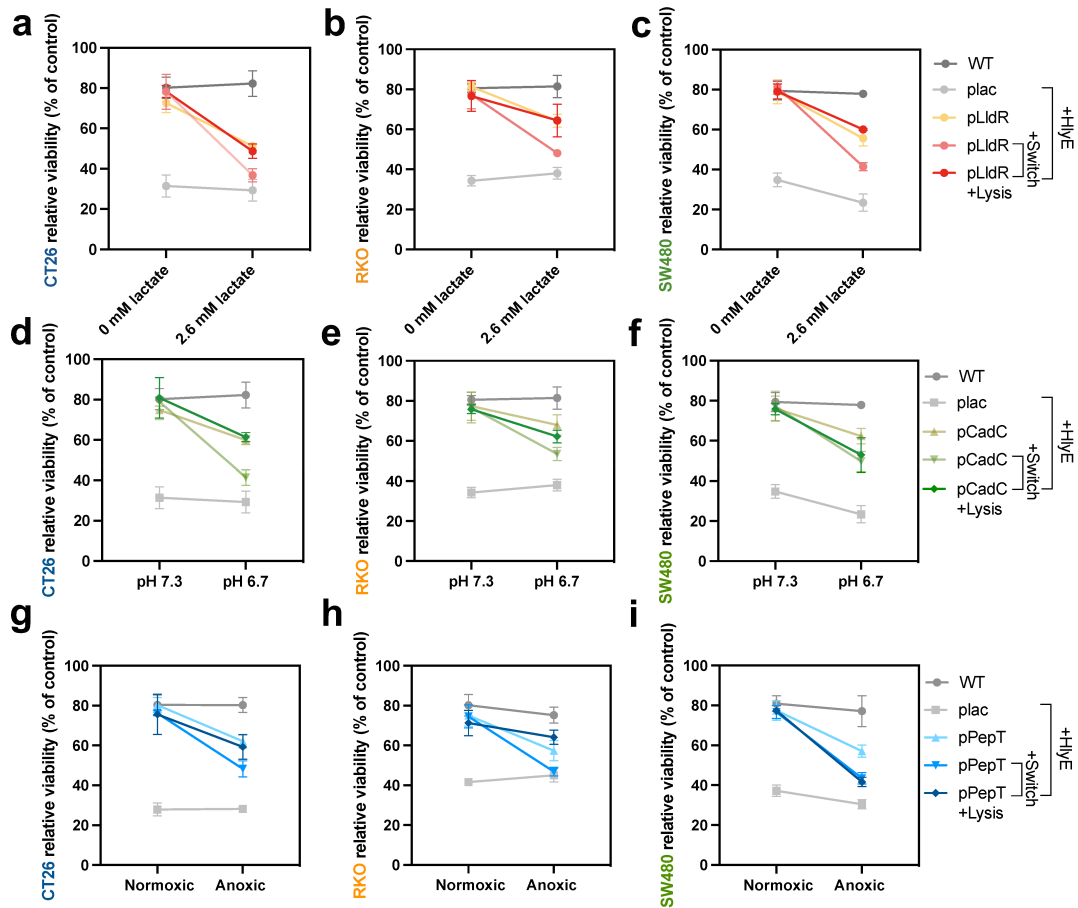

208

209 **Supplemental Figure 6.** Effects of lactate (a-c), pH (d-e), and hypoxia (g-i) induced  
 210 therapeutic and control strains on the activity of CT26, RKO, and SW480. For lactate  
 211 and pH-based effector strains, fresh DMEM medium was used as the non-induced  
 212 condition. Cells cultured for 3 days with accumulated lactate were used as induction  
 213 conditions. For the anoxic-induced engineered strain, the damage effect of the  
 214 engineered strains on tumor cells was tested in anoxic and normoxic conditions  
 215 respectively. Error bars indicate  $\pm$  s.e.m for three measurements.

216



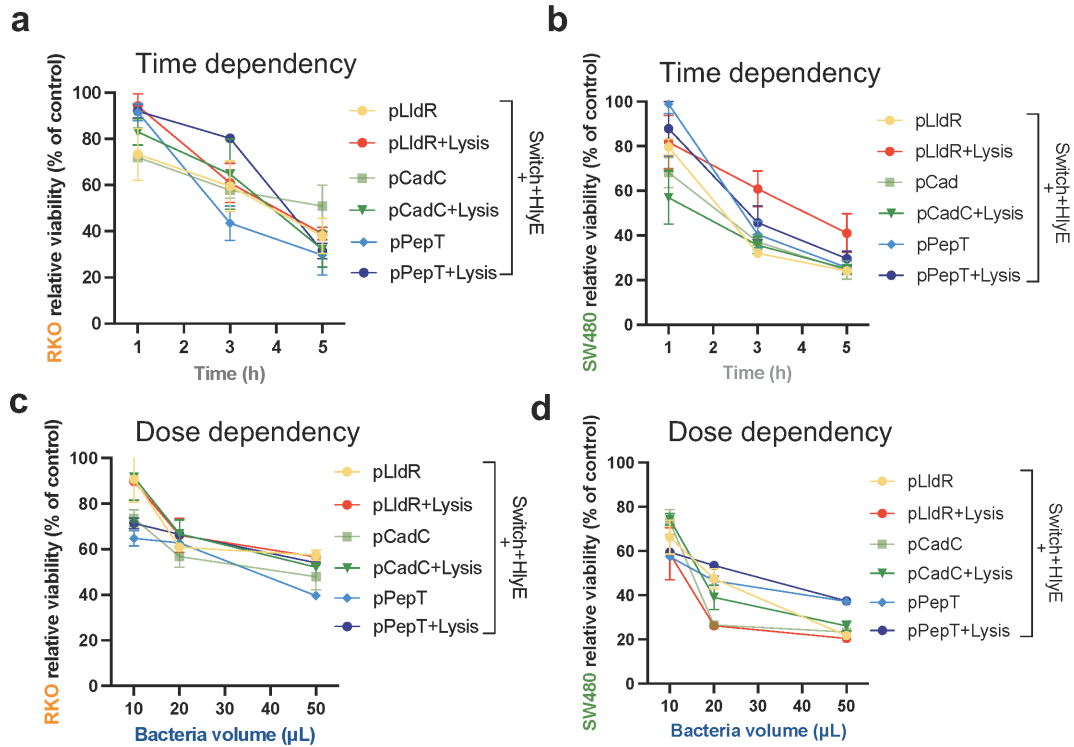

217

218 **Supplemental Figure 7. a-b**, RKO and SW480 viability after co-culture with 30  $\mu\text{L}$

219 therapeutic strains (carrying *hlyE* gene) for varying time. **c-d**, RKO and SW480 cell

220 viability after co-culture with different volume therapeutic strains over 3 h. All bacteria

221  $\text{OD}_{600}$  was adjusted to 0.6. Error bars indicate  $\pm$  s.e.m for three measurements.

222

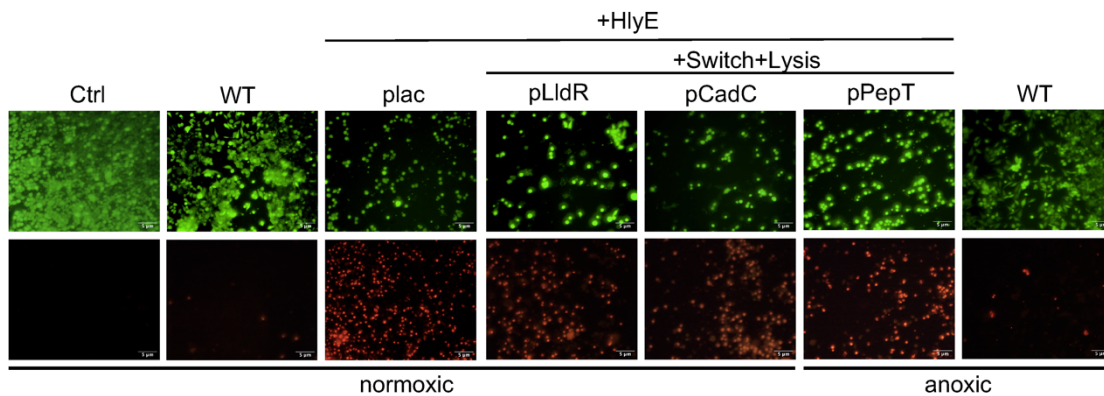

223

224 **Supplemental Figure 8.** Fluorescence microscope of live and dead cells after co-

225 culture with 30 all lysis therapeutic strains for 3 h. CT26 cell line were stained with

226 Calcein/PI (Olympus BX53, 40x magnification). The scale bar labeled in the lower

227 right corner of the image represents 5  $\mu\text{m}$ .

228

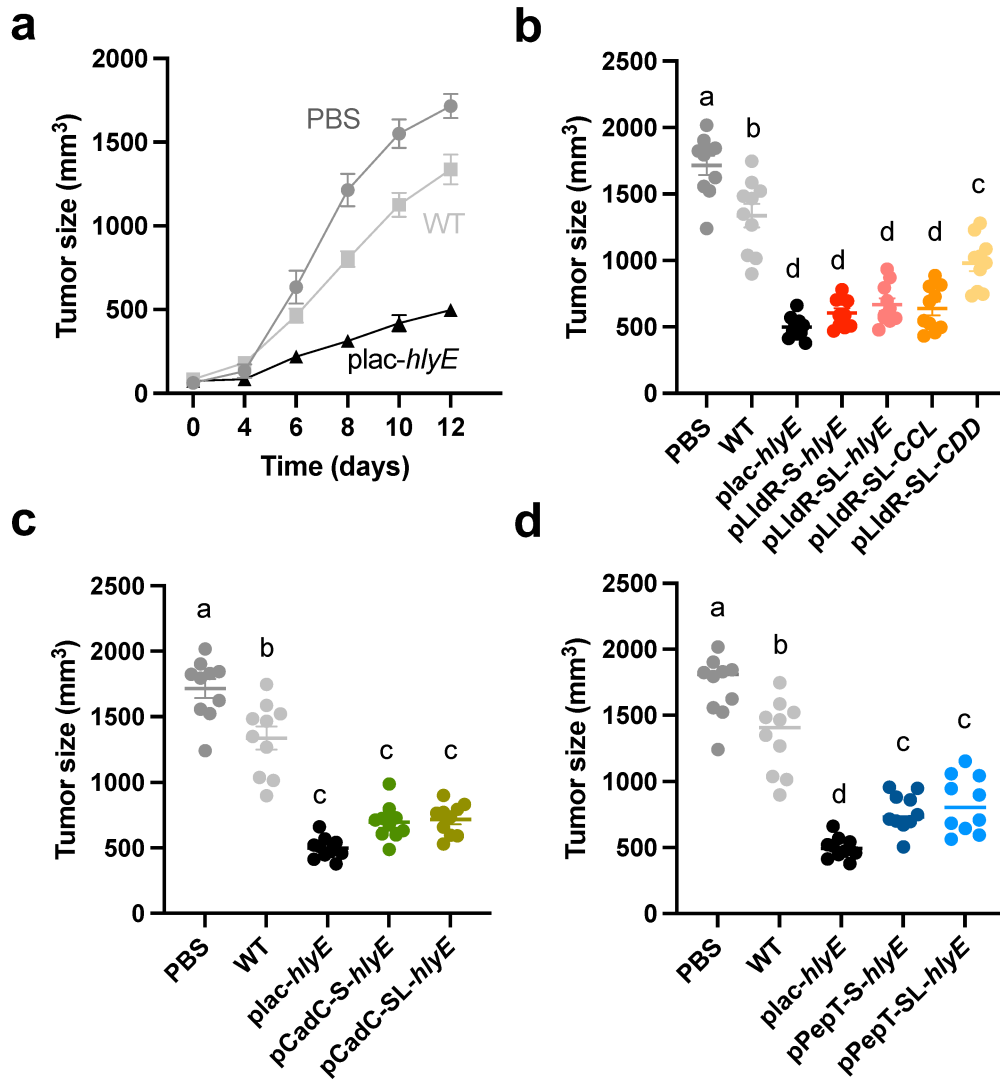

229

230 **Supplemental Figure 9. Anti-tumor efficacy of the engineered EcNs in the CT26**

231 **homograft mouse model. a**, Increased sizes of CT26-derived tumors were recorded

232 from 150 mm<sup>3</sup>. Mice (n = 10 in each group) were subcutaneously inoculated with 5 ×

233 10<sup>6</sup> CT26 cells in the rear right flank and then received 20 μL 0.9% saline (control), 2

234 × 10<sup>6</sup> c.f.u/head constitutive therapeutic EcN (*plac-hlyE*) or wild type EcN. **b-d**,

235 Comparison of tumor size extracted from each treatment group after mouse sacrifice

236 (One-way ANOVA with Tukey post-test; significantly different groups are marked

237 with different lowercase letters). The "S" in the legend represents the integration of the

238 XOR Switch part of the engineered EcN, and the "L" represents the addition of the lysis

239 gene (*φX174E*).

240

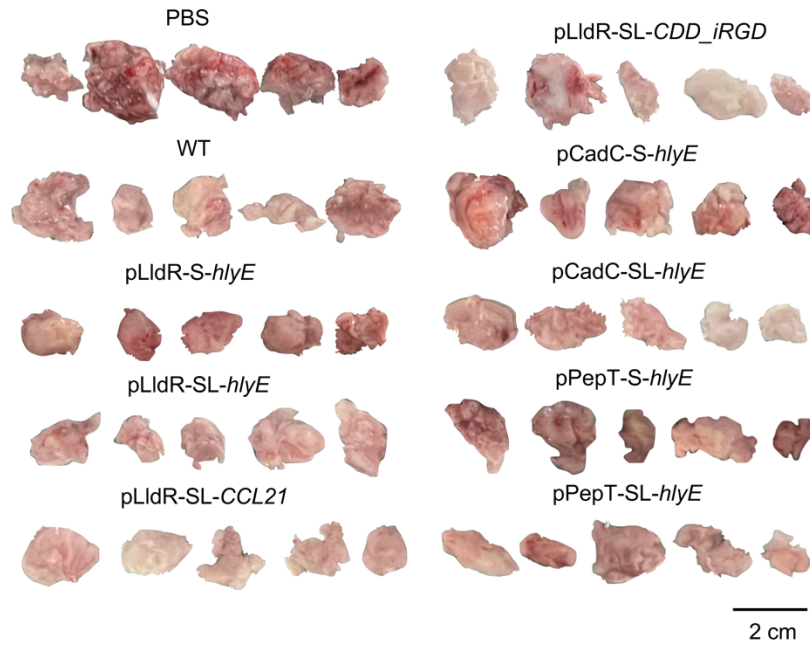

241

242 **Supplemental Figure 10. Representative extracted tumor tissues from each**  
 243 **treatment group.** The "S" in the legend represents the integration of the XOR Switch  
 244 part of the engineered EcN, and the "L" represents the addition of the lysis gene  
 245 ( $\phi$ X174E). The scale bar labeled in the lower right corner of the image represents 2 cm.

246

247

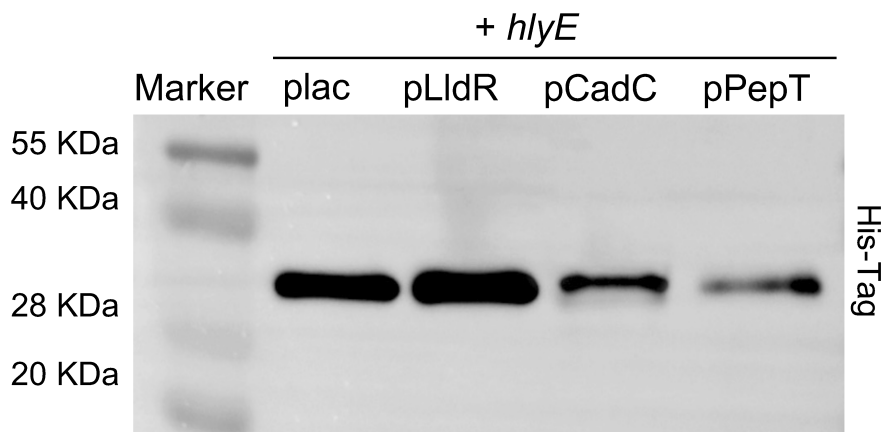

248

249 **Supplemental Figure 11. Western blot showed the expression of *hlyE* in tumor**  
 250 **tissues.** Different therapeutic strains were administered to subcutaneous tumors of mice  
 251 by intratumorally injection. Tumor samples were collected 12 hours later and analyzed  
 252 for HlyE protein expression.

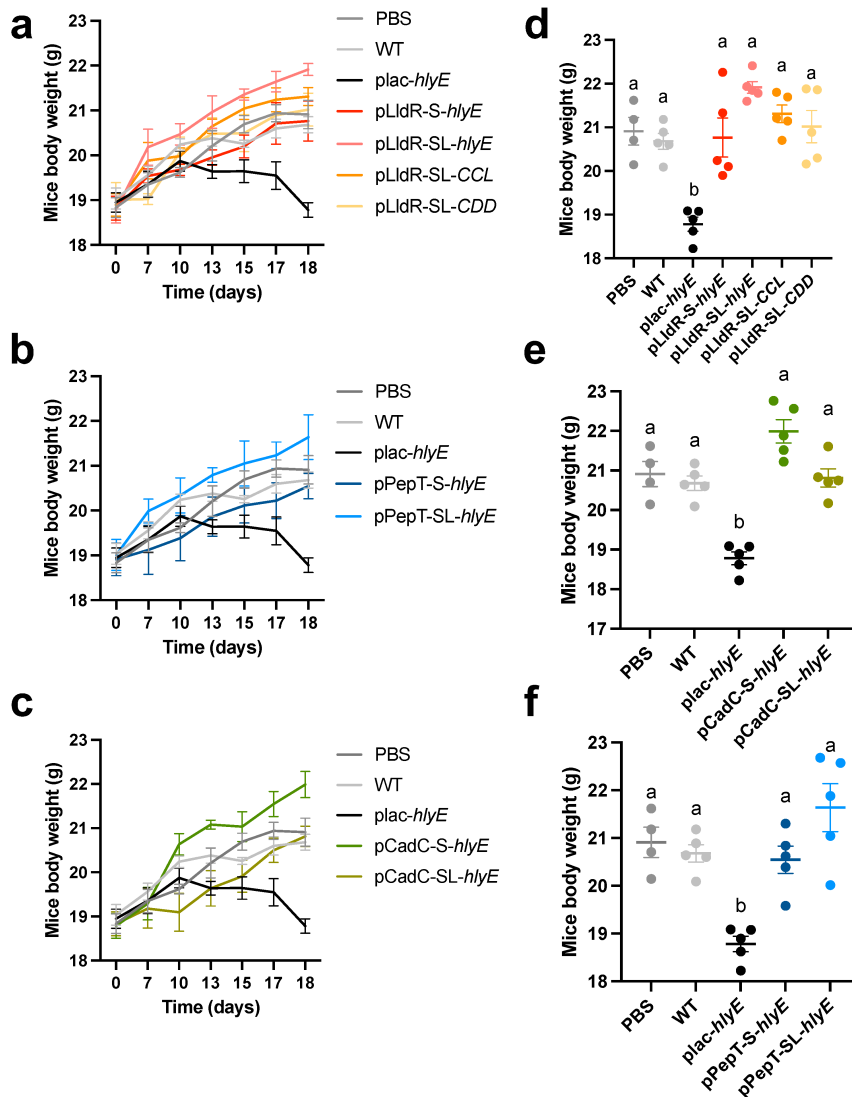

254

255 **Supplemental Figure 12. Body weight analysis of subcutaneous tumor model mice.**

256 **a-c**, Mice body weight over time for subcutaneous tumor bearing mice with tumor  
 257 injection of therapeutic strains (n = 5 mice). In the legend, "S" represents the  
 258 engineering strain carrying XOR Switch gate, and "L" represents the engineering strain  
 259 harboring lysis part. **d-f**, Comparison of mice body weight from each treatment group  
 260 after 18 days of CT26 homograft (One-way ANOVA with Tukey post-test;  
 261 significantly different groups were marked with different lowercase letters).

262

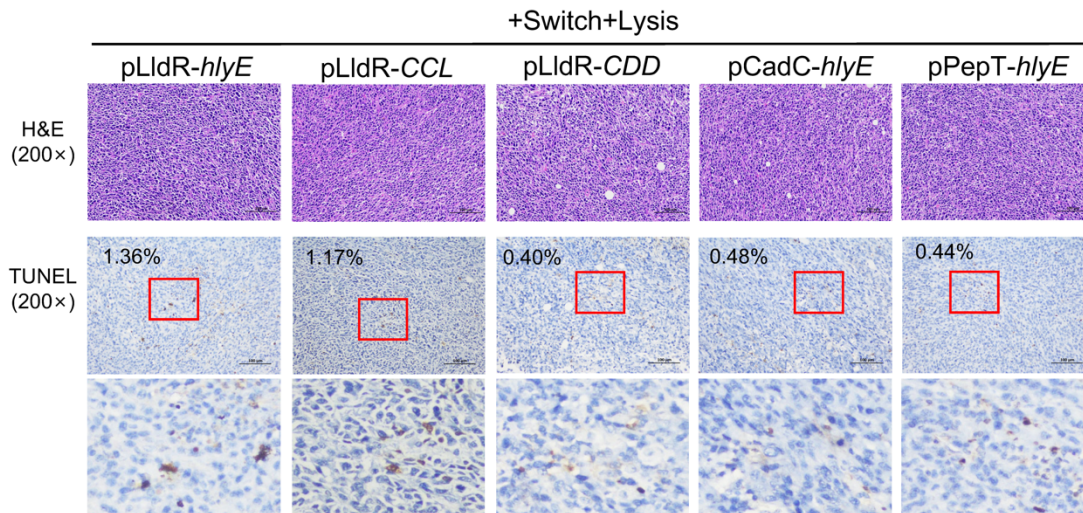

263

264 **Supplemental Figure 13. H&E staining and TUNEL staining in the same tumor**  
 265 **sections.** Up: H&E staining images of tumor tissue from different treatment groups.  
 266 Scale bar = 100  $\mu$ m. Down: TUNEL staining images of tumor tissue from different  
 267 treatment groups. Scale bar = 100  $\mu$ m. The ratio of TUNEL-positive cells (brown cells)  
 268 to total cells was analyzed using Aipathwell software and shown in the upper left of the  
 269 images. The red box marks the magnified region, highlighting the representative area  
 270 of positive cells in the TUNEL image and is displayed below.

271

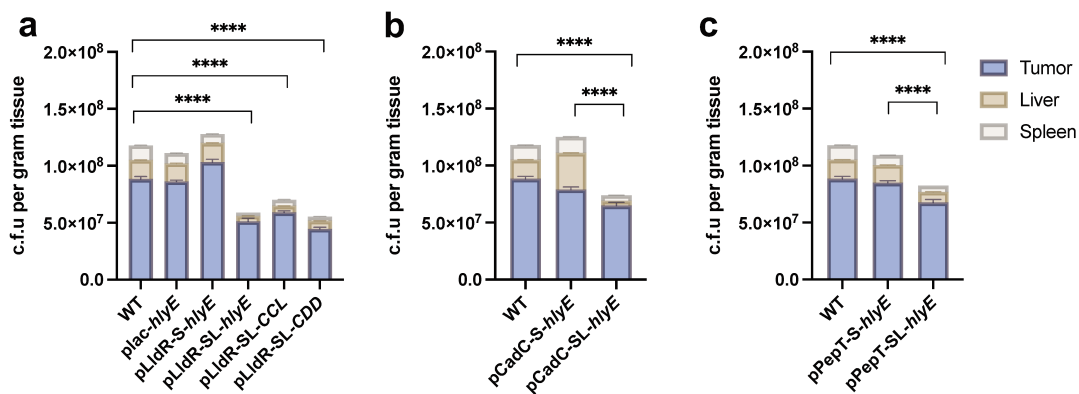

272

273 **Supplemental Figure 14. Bacterial colonization of tissues in CT26 homograft**  
 274 **model mice.** Mice were euthanized at the end of the experiment. The tumor, liver and  
 275 spleen were homogenized and plated on LB agar plates with antibiotics selection.  
 276 Colonies were counted the next day. Absolute c.f.u. per gram of recovered bacteria  
 277 from each gut compartment. n = 3 biological replicates. Data are presented as mean  $\pm$

278 s.e.m. Statistical analysis was performed for bacteria amount in tumor using One-way  
 279 ANOVA with Tukey post-test. \*\*\*\*  $p < 0.0001$ .  
 280

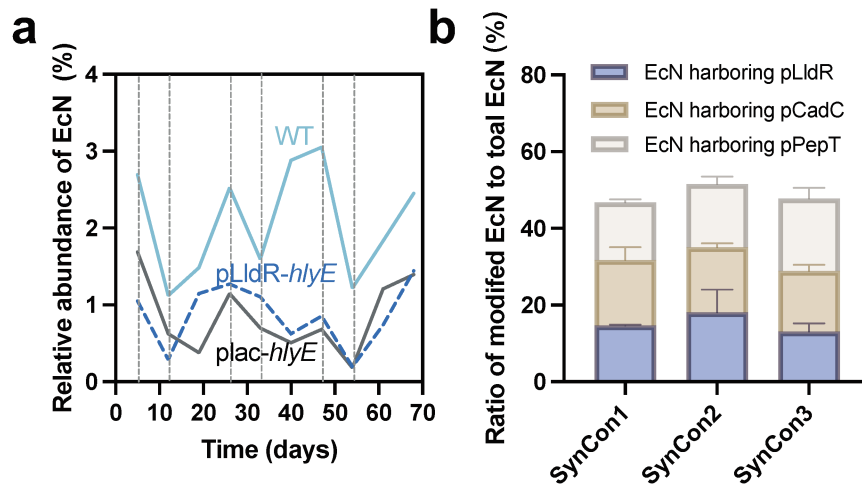

281  
 282 **Supplemental Figure 15. Quantification analysis of EcNs in the intestinal of**  
 283 **AOM/DSS model mice.** **a**, Temporal dynamics of the EcNs population during whole  
 284 experimental period (Black dashed lines represent the DSS treatment episodes). **b**, The  
 285 ratio of SynCon members to total EcN were calculated using qPCR for fecal DNA  
 286 analysis (n = 3, ± s.e.m).  
 287

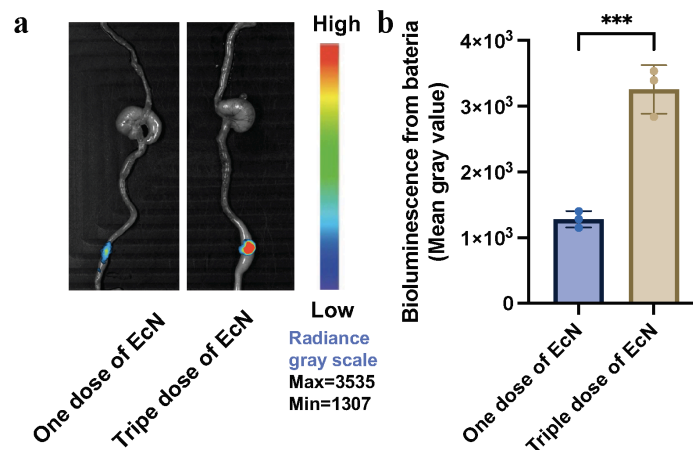

288  
 289 **Supplemental Figure 16. In vivo bioluminescence analysis.** **a**, Bioluminescence  
 290 images of mice and their GI tract after 3 h post-oral gavage by EcN-lux (pSB1A3-plac-

291 *luxCDABE*). **b**, Comparison of bacterial bioluminescence intensity between two groups  
292 based on the average gray value ( $n = 3, \pm$  s.e.m; Student's *t*-test; \*\*\* $p < 0.001$ ).

293

294

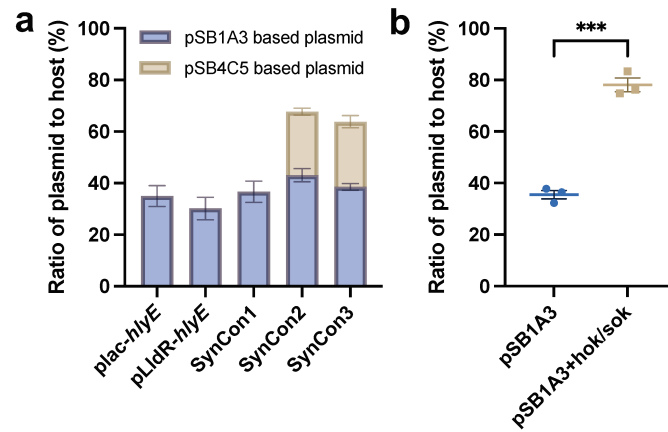

295

296 **Supplemental Figure 17. Plasmid retention rates of single EcNs and SynCons in**

297 **mouse gut. a**, The proportion of plasmids to whole EcN were calculated using qPCR

298 for fecal DNA analysis ( $n = 3$  biologically independent samples; data are presented as

299 mean  $\pm$  s.e.m). **b**, After 2 d of gavage, mice fecal DNA were analyzed using qPCR to

300 assess the effect of *hok/sok* cassette on the plasmid loss rate of EcN carrying pSB1A3

301 in mouse intestine ( $n = 3, \pm$  s.e.m; Student's *t*-test; \*\*\* $p < 0.001$ ).

302



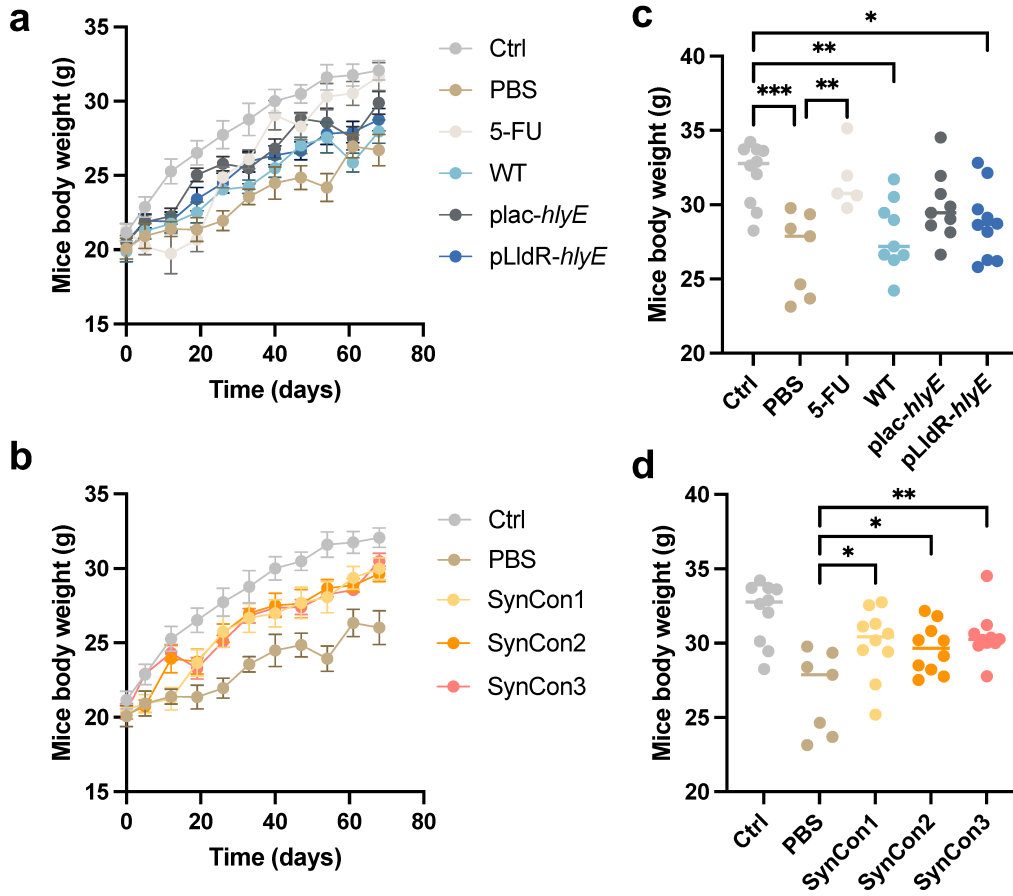

303

304 **Supplemental Figure 18. Impact of different therapeutic regimens on the body**

305 **weight of mice in the AOM/DSS mouse model. a-b,** Changes in the bodyweight of

306 mice were recorded every week. **c-d,** Comparison of mice body mice from each

307 therapeutic group after 68 days AOM treatment (One-way ANOVA with Tukey post-

308 test; \* $p < 0.05$ , \*\* $p < 0.01$ , \*\*\* $p < 0.001$ ).

309



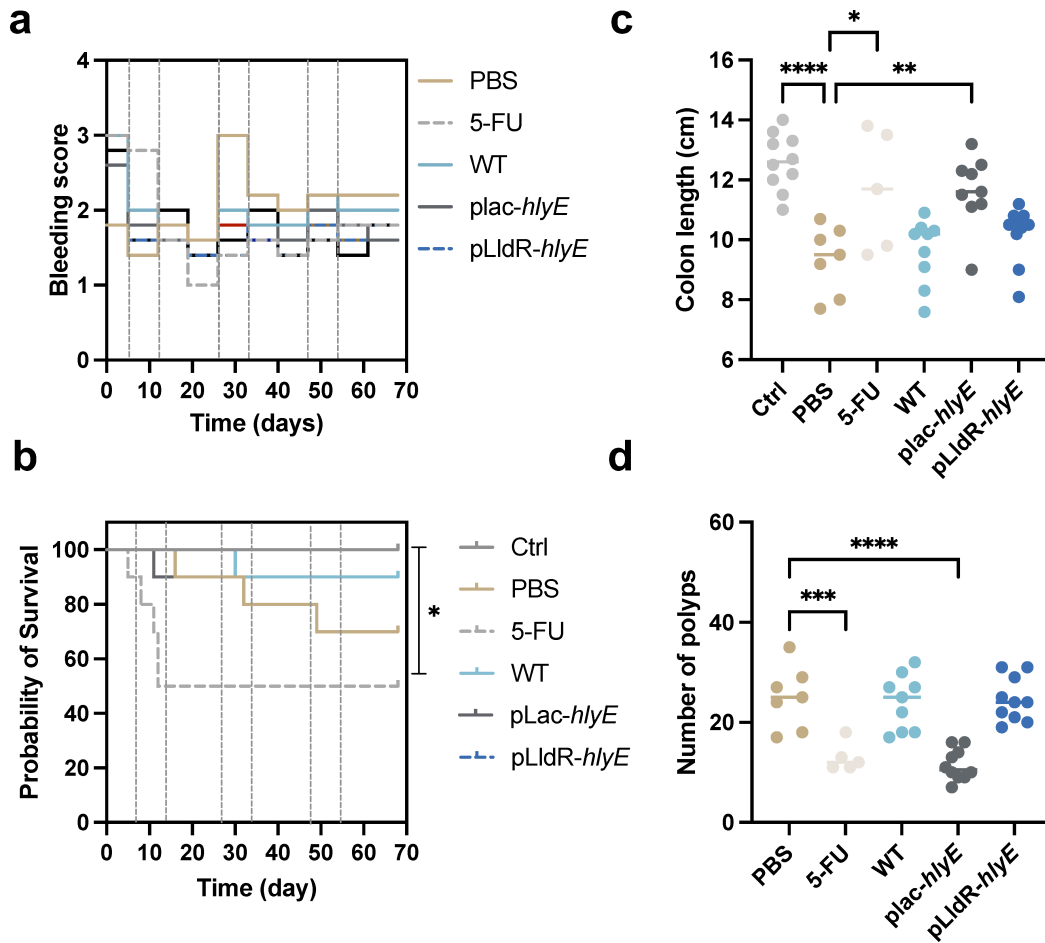

310

311 **Supplemental Figure 19. Assessing the severity of colitis in AOM/DSS model mice**

312 **subjected to different therapeutic regimens. a,** Bleeding scores were assessed every

313 week using hemocult testing and visible signs. Dashed lines represent the DSS

314 treatment episodes. **b,** Kaplan-Meier survival curves for mouse with different treatment

315 groups. Log-rank test was performed to measure the statistical significance. \* $p < 0.05$ .

316 Ctrl group did not receive AOM and DSS treatments. **c,** Colon length and **d** number of

317 polyps were measured after 68 days (One-way ANOVA with Tukey post-test; \* $p < 0.05$ ,

318 \*\* $p < 0.01$ , \*\*\* $p < 0.001$ , \*\*\*\* $p < 0.0001$ ).

319

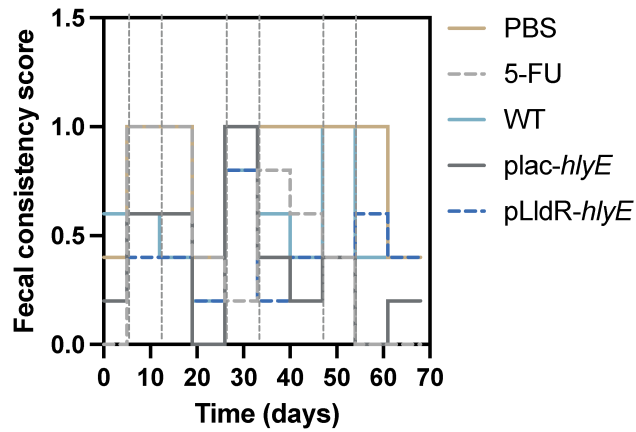

320

321 **Supplemental Figure 20.** Fecal consistency of AOM/DSS model mice treated with

322 different therapeutic regimens.

323

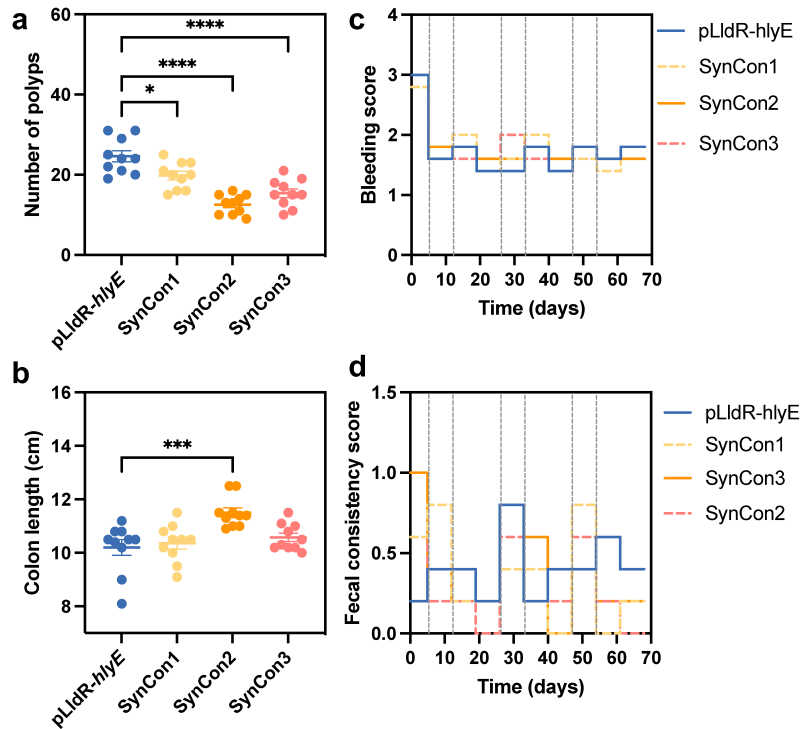

324

325 **Supplemental Figure 21.** The therapeutic effects of the single strain and SynCon

326 strains on AOM/DSS model mice. Comparison of (a) the number of polyps (One-way

327 ANOVA with Tukey post-test; \* $p < 0.05$ , \*\*\*\* $p < 0.0001$ ); (b) colon length (One-way

328 ANOVA with Tukey post-test; \*\*\* $p < 0.001$ ); (c) occult blood score; and (d) fecal

329 consistency score among pLldR-*hlyE* and SynCons groups.

330

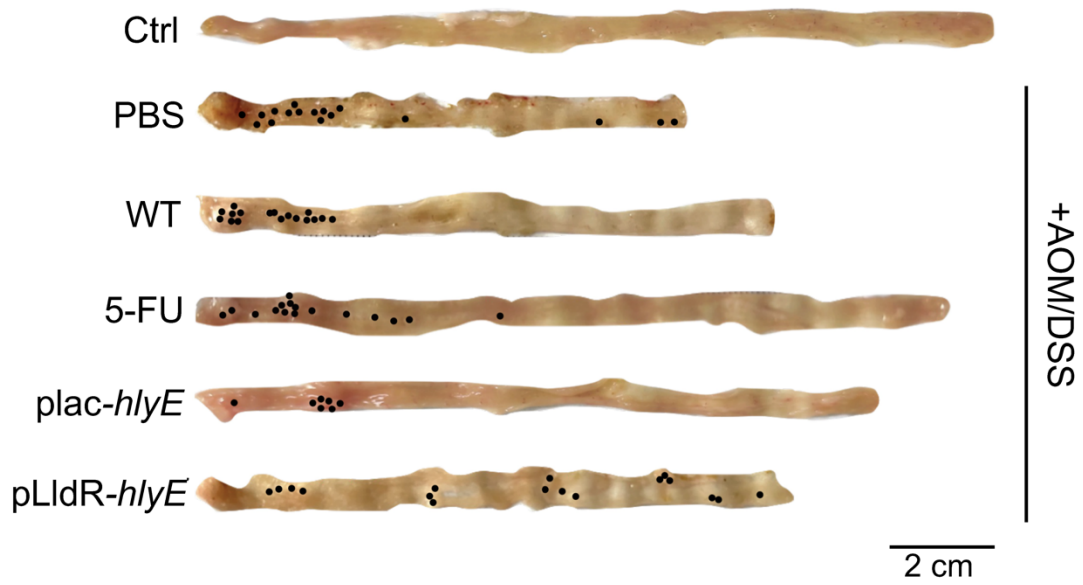

331

332 **Supplemental Figure 22.** Macroscopic appearance of colons in AOM/DSS model

333 mice received different treatment. Black dots denote visible tumors. Scale bar (2 cm)

334 labeled at bottom right of images.

335

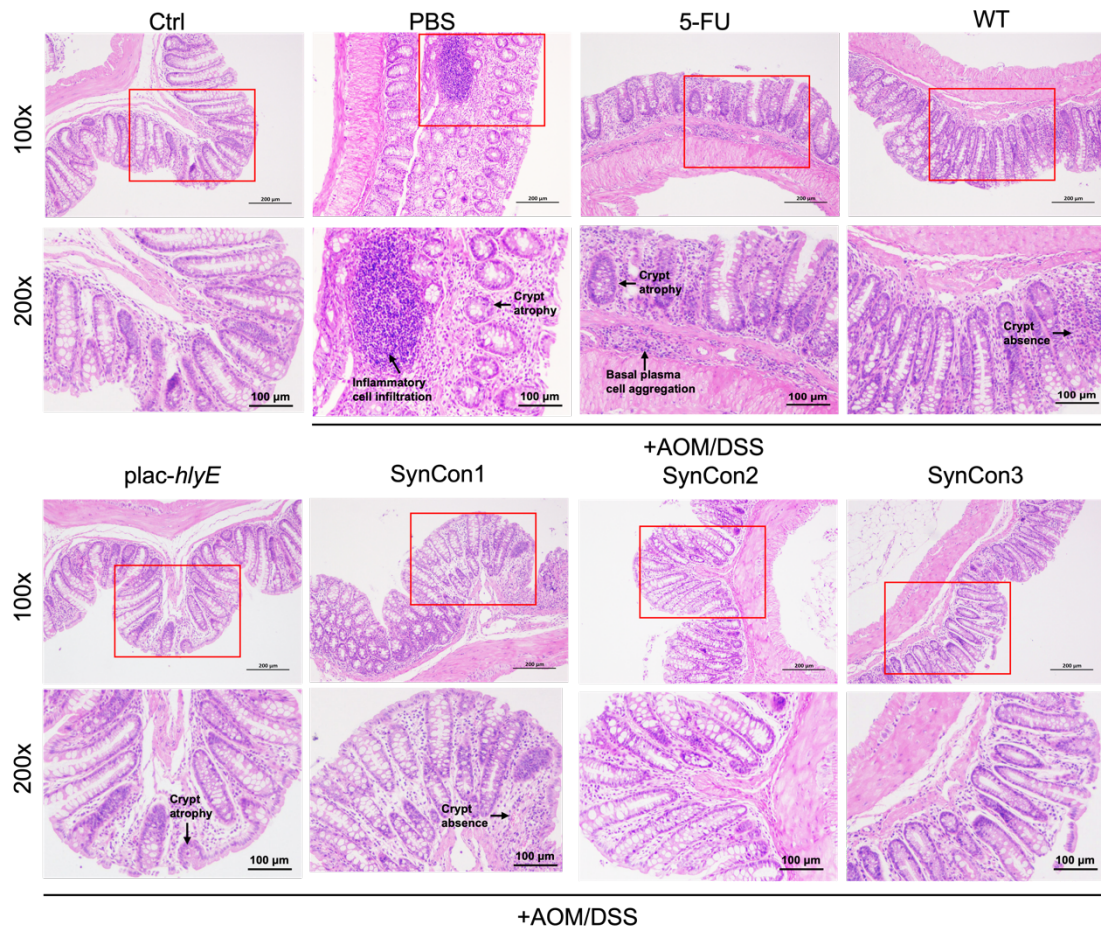

336

337 **Supplemental Figure 23.** H&E staining for colon sections taken from AOM/DSS

338 model mice with different treatments. Each group provides 100x and 200x

339 magnification of images, respectively. The red box indicates the enlarged portion. The

340 scale is in the lower right corner of the image. Scale bar labeled in right corner

341 represents 200  $\mu\text{m}$  for 100x magnification and 100  $\mu\text{m}$  for 200x magnification.

342

343

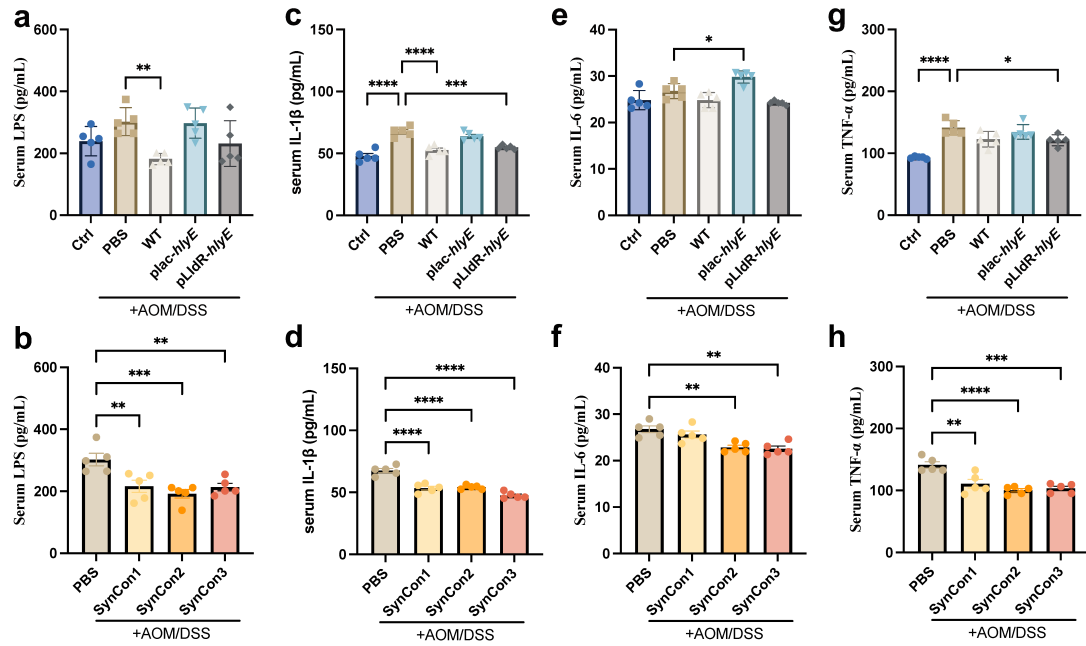

344

345 **Supplemental Figure 24. Effects of dietary different EcNs and SynCons on the**

346 **serum contents of the AOM/DSS-induced CRC mice.** The levels of **(a-b)**

347 **Lipopolysaccharides (LPS), pro-inflammatory cytokines (c-d) IL-1β, (e-f) IL-6 and (g-**

348 **h) TNF-α in the serum of each group mice on day 68 were determined using ELISA.**

349 **Data are presented as mean values ± s.e.m (n =5 biologically independent samples).**

350 **Statistical analysis was performed using One-way ANOVA with Tukey post-test (\**p* <**

351 **0.05, \*\* *p* < 0.01, \*\*\* *p* < 0.001, and \*\*\*\* *p* < 0.0001).**

352

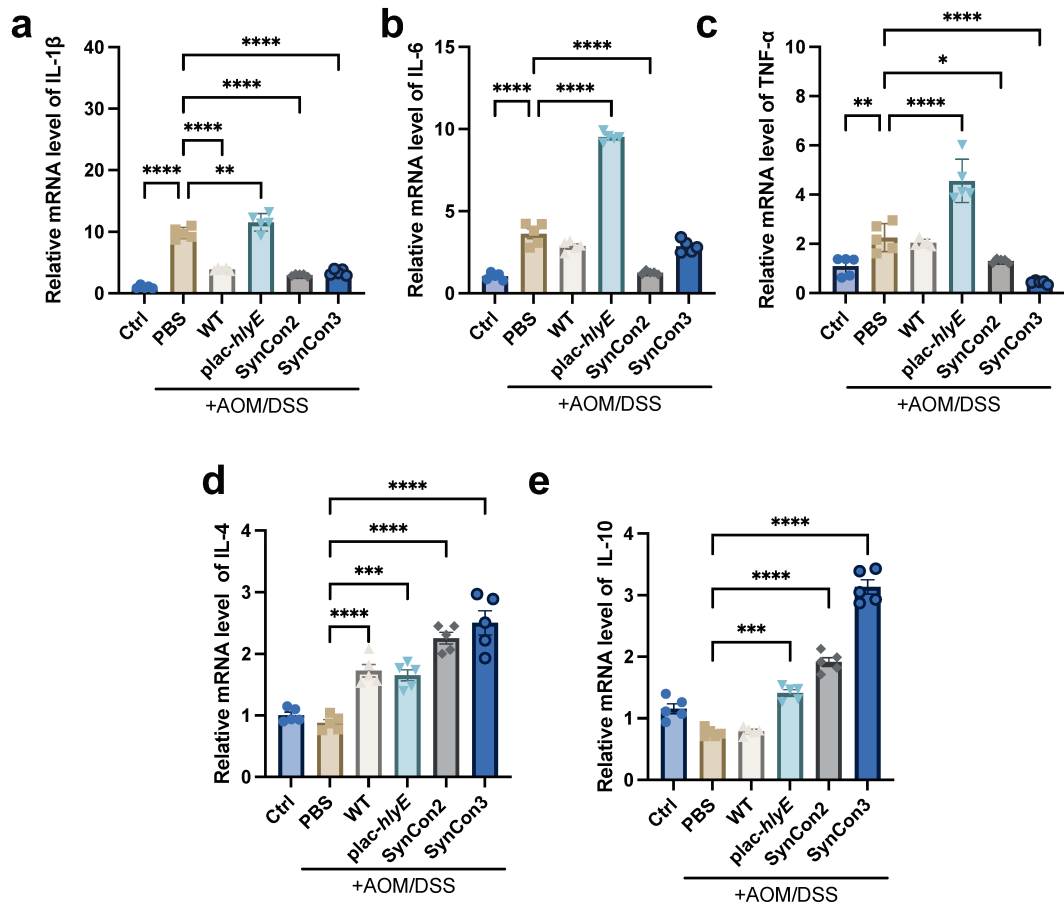

353

354 **Supplemental Figure 25. Inflammation response of the mouse colon by treatment**

355 **of AOM/DSS and administration of different EcNs and SynCons.** The mRNA levels

356 of pro-inflammatory cytokines **(a) IL-1 $\beta$ , (b) IL-6, (c) TNF- $\alpha$ ,** or anti-inflammatory

357 cytokines **(d) IL-4, (e) IL-10** in mice colon were quantified using qRT-PCR (n = 5,  $\pm$

358 s.e.m). Statistical analysis was performed using One-way ANOVA with Tukey post-

359 test (\* $p < 0.05$ , \*\*  $p < 0.01$ , \*\*\*  $p < 0.001$ , and \*\*\*\*  $p < 0.0001$ ).

360

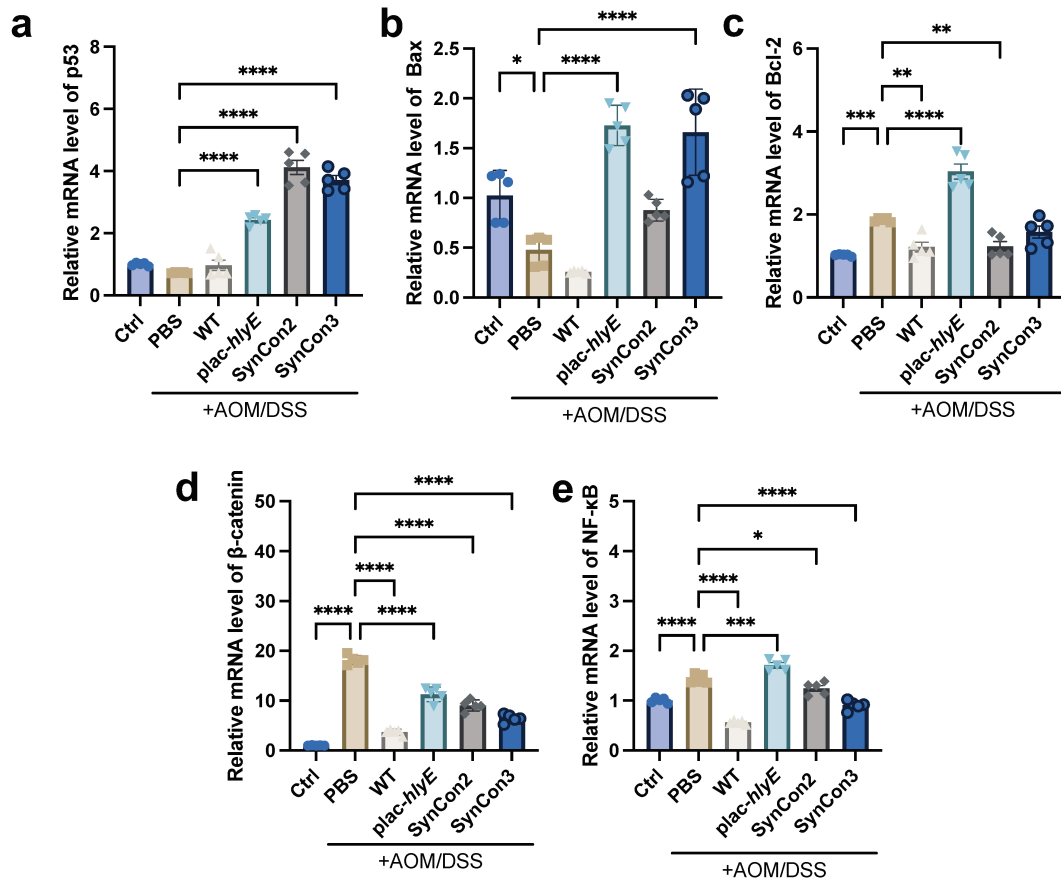

361

362 **Supplemental Figure 26. Effects of dietary different EcNs and SynCons on colon**

363 **tumorigenesis of the AOM/DSS-induced CRC mouse model.** The mRNA levels of

364 pro-apoptosis markers **(a)** p53, **(b)** Bax, anti-apoptosis markers **(c)** Bcl-2, and tumor

365 cell proliferation markers **(d)**  $\beta$ -catenin, **(e)** NF- $\kappa$ B in mice colon were quantified using

366 qRT-PCR (n = 5,  $\pm$  s.e.m). Statistical analysis was performed using One-way ANOVA

367 with Tukey post-test (\* $p < 0.05$ , \*\* $p < 0.01$ , \*\*\* $p < 0.001$ , and \*\*\*\* $p < 0.0001$ ).

368

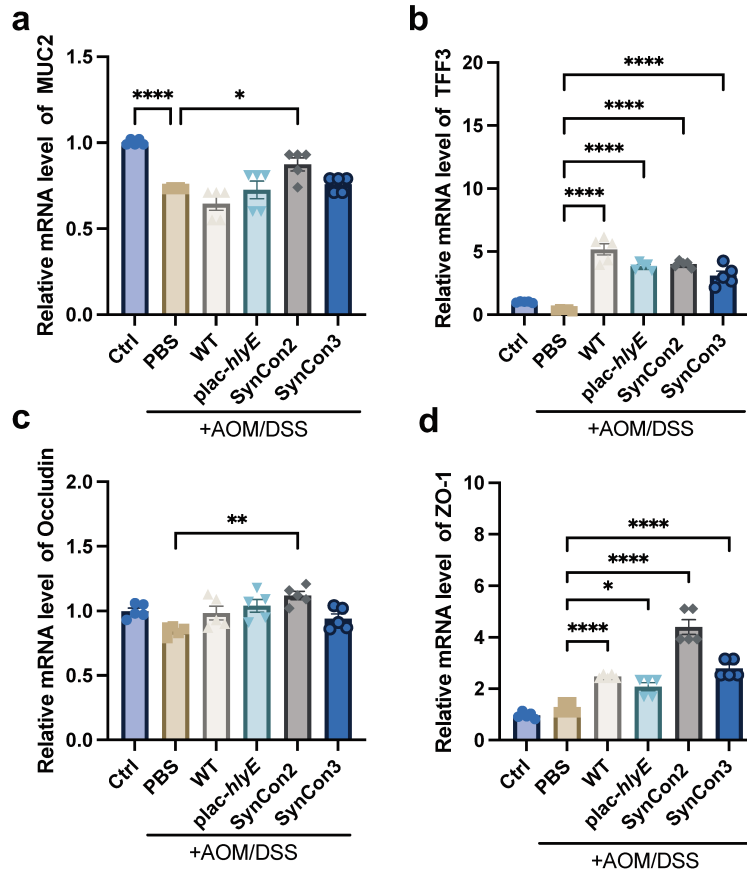

369

370 **Supplemental Figure 27. Effects of different EcNs and SynCon3 on the gut barrier**

371 **integrity of the AOM/DSS-induced CRC mouse model.** The mRNA expression

372 levels of (a) MUC2, (b) TFF3, (c) Occludin and (d) ZO-1 the mouse colon were

373 measured using qRT-PCR (n = 5, ± s.e.m). Statistical analysis was performed using

374 One-way ANOVA with Tukey post-test (\* $p < 0.05$ , \*\* $p < 0.01$ , and \*\*\*\* $p < 0.0001$ ).

375

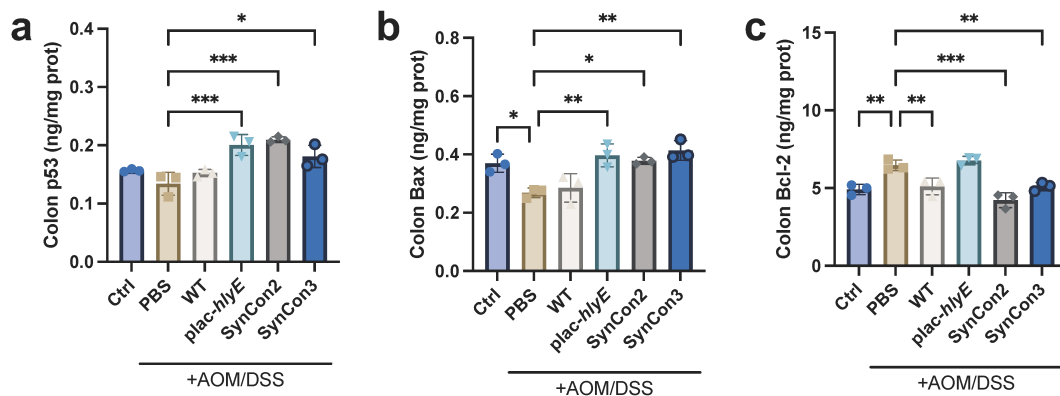

376

377 **Supplemental Figure 28. Protein levels of tumor necrosis factor in distal colon**

378 **samples across different groups.** Expression levels of (a) p53, (b) Bax, and (c) Bcl-2



379 proteins in colon tissue. Apoptotic factor levels from ELISA were normalized using the  
 380 total protein concentration determined by the Bradford assay kit (n = 3, ± s.e.m).  
 381 Statistical analysis was performed using One-way ANOVA with Tukey post-test (\*p <  
 382 0.05, \*\* p < 0.01, and \*\*\* p < 0.001).  
 383

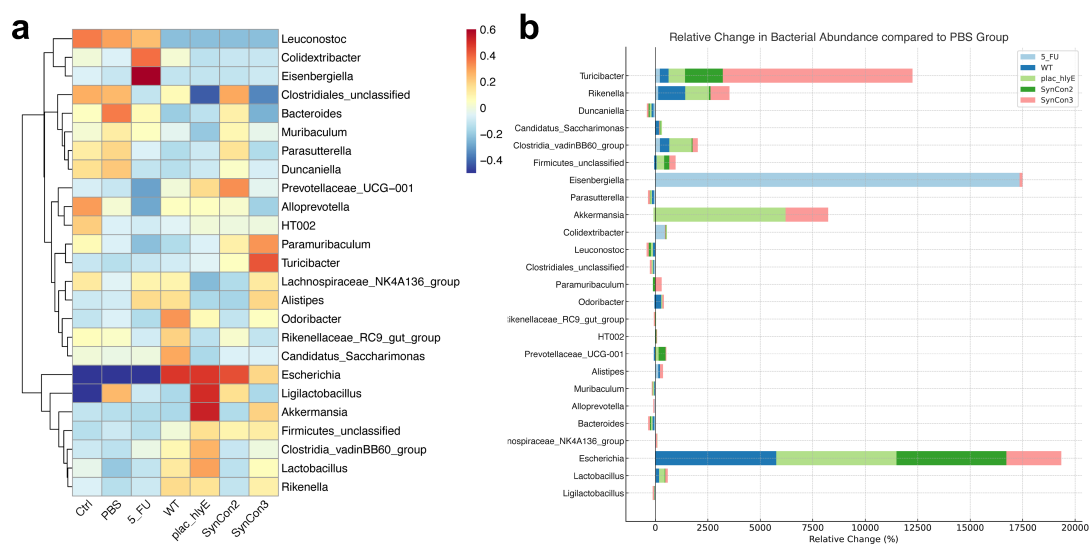

384  
 385 **Supplemental Figure 29. Genus-level analysis of gut microbial composition. a,**  
 386 **Heatmap exhibited relative abundance of gut microbial composition at top 25 genus**  
 387 **level. b, Relative change in bacterial abundance compared to PBS group.**  
 388

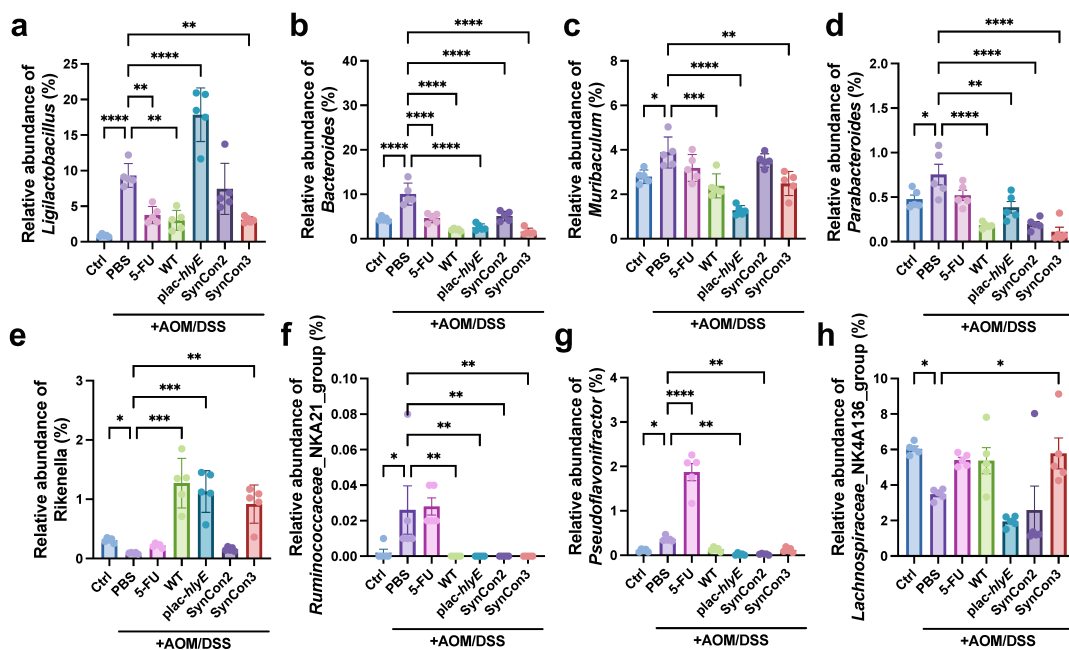

389

390 **Supplemental Figure 30. Effects of different therapies on gut microbiota**  
 391 **composition at genus level in AOM/DSS model mice.** Comparison of relative  
 392 abundance of (a) *Ligilactobacillus*, (b) *Bacteroides*, (c) *Muribaculum*, (d)  
 393 *Parabacteroides*, (e) *Intestinimonas*, (f) *Ruminococcus\_NK4A214\_group*, (g)  
 394 *Pseudoflavonifractor* and (h) *Lachnospiraceae\_NK4A136\_group* in the indicated  
 395 groups (n = 5, ± s.e.m). Statistical analysis was performed using One-way ANOVA  
 396 with Tukey post-test (\* $p < 0.05$ , \*\*  $p < 0.01$ , \*\*\*  $p < 0.001$ , and \*\*\*\*  $p < 0.0001$ ).  
 397

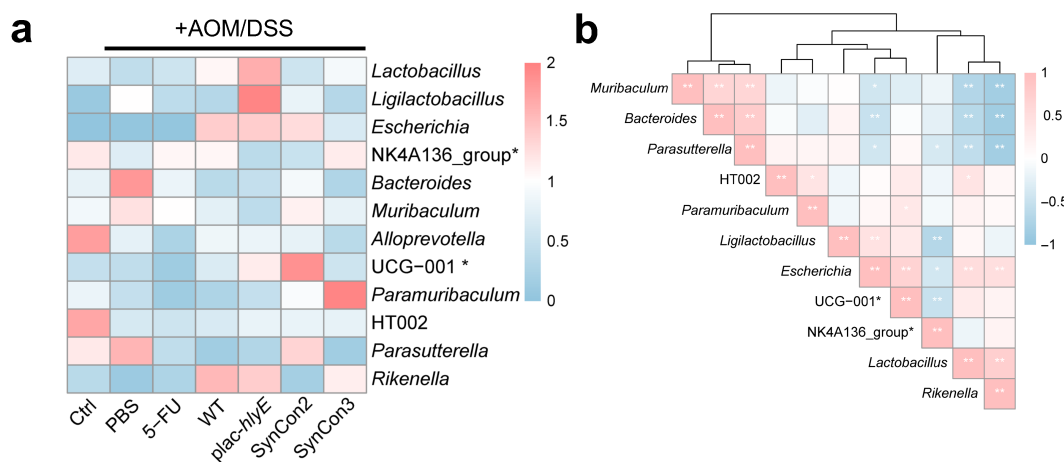

398  
 399 **Supplemental Figure 31. The intestinal microbiota distribution at top 12 most**  
 400 **abundant genus.** a, The heatmap showed the difference of 12 most abundant genera in  
 401 each group. NK4A136\_group\*: *Lachnospiraceae\_NK4A136\_group*; UCG-001\*:  
 402 *Prevotellaceae\_UCG\_001*. b, Positive and negative correlation matrix between the top  
 403 12 most abundant genus taxa. Results of a pairwise Spearman's rank correlation.  
 404 Correlations with adjusted  $p$  values less than 0.05 by the Benjamini-Hochberg FDR  
 405 method are marked with white asterisk symbols. Related genera based on Euclidean  
 406 distance were clustered together. Rubine, positive correlation; sapphire, negative  
 407 correlation.  
 408

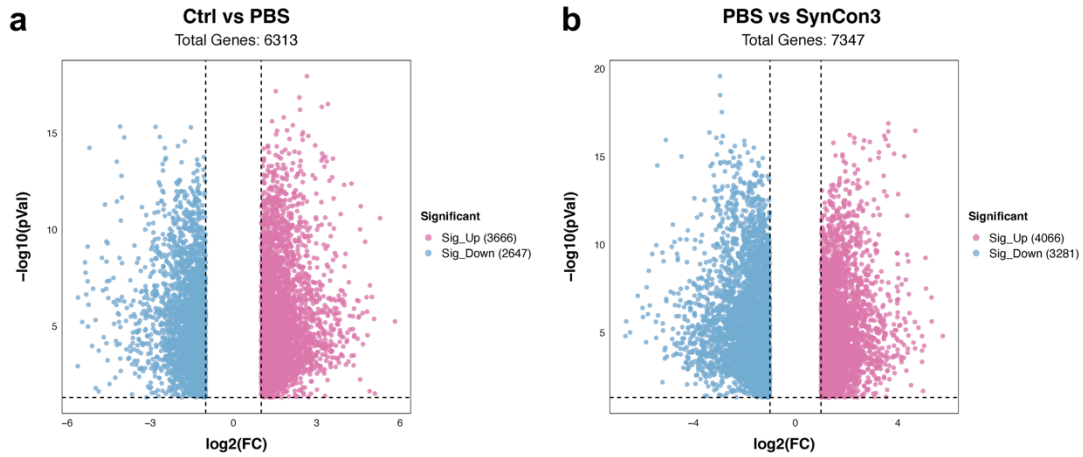

409  
410  
411  
412  
413  
414  
415  
416  
417

**Supplemental Figure 32. Volcano plots of differential metabolites.** **a**, The volcano plot displays differential metabolites between the Ctrl and PBS groups. **b**, The volcano plot illustrates differential metabolites between the PBS and SynCon3 groups. The x-axis represents the  $\log_2$  transformation of the fold change (FC) of metabolite ions between the comparison groups, while the y-axis represents the  $-\log_{10}$  transformation based on the Student's t-test  $p$ -value. Metabolites with an FC value greater than 2 and a  $p$ -value less than 0.05 are considered differential.

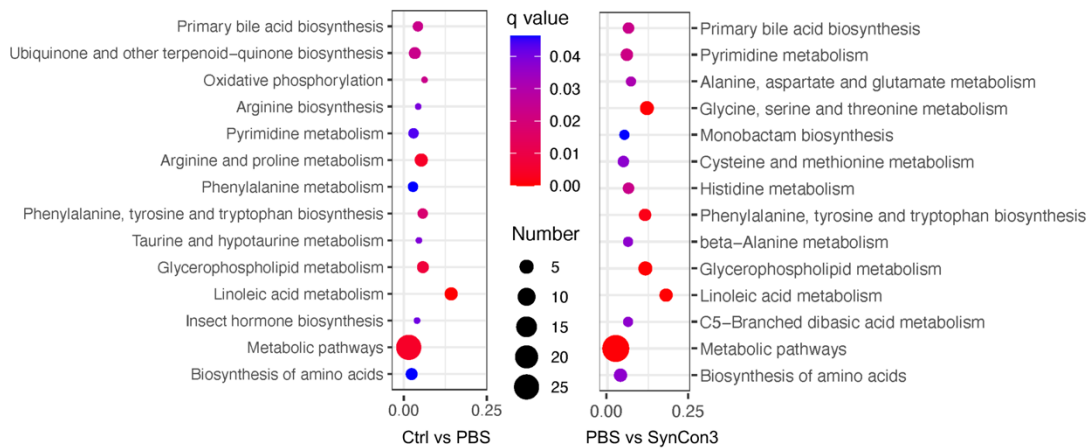

418  
419  
420  
421  
422  
423  
424

**Supplemental Figure 33. KEGG pathway enrichment analysis of differential metabolites.** The KEGG enrichment analysis was conducted using ggplot2, with results presented as a scatter plot. The q-value (adjusted  $p$ -value) is denoted by different colors; a smaller q-value indicates a higher degree of KEGG enrichment. 'Number' displays the count of enriched pathways. The x-axis represents the Rich Factor, indicating the relative abundance of differential metabolites in the pathway.

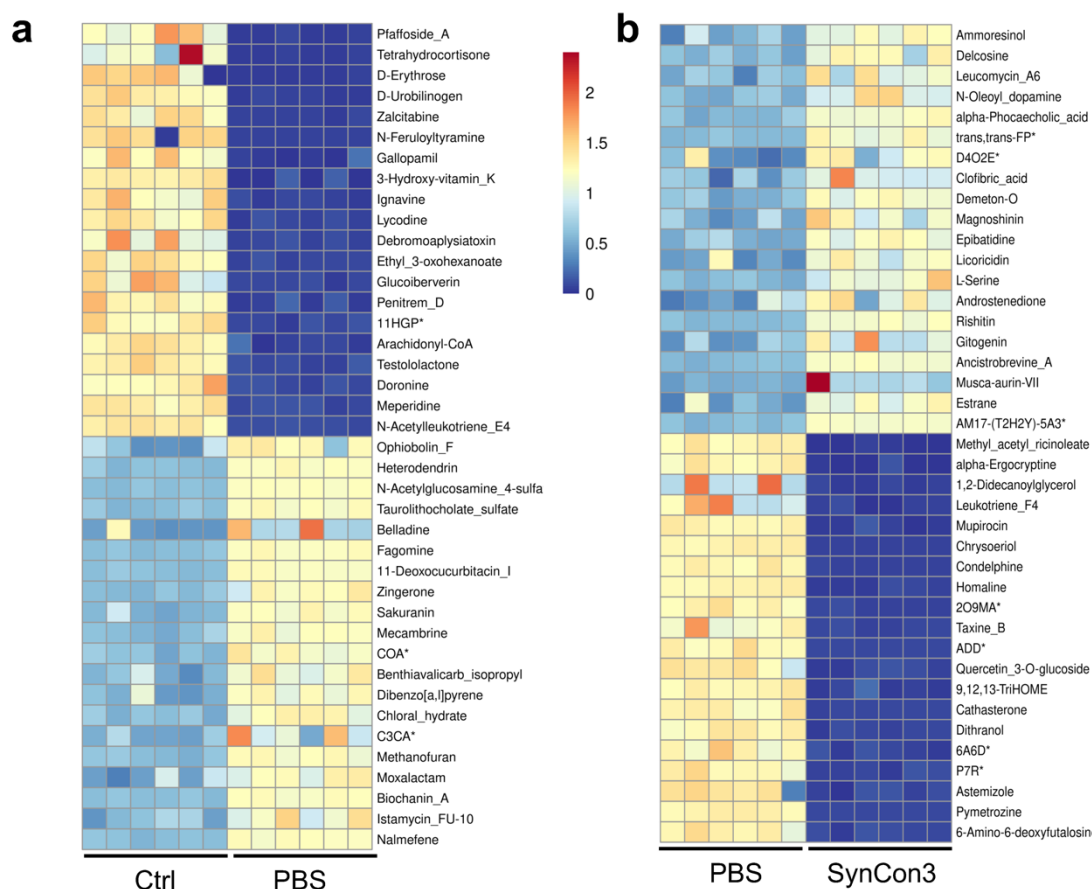

426

427 **Supplemental Figure 34. Differential metabolites visualized in heatmaps. a,**

428 Heatmap illustrating the top 20 differential metabolites between the Ctrl and PBS

429 groups. 11HGP\*: 11-Hydroxyiridodial\_glucoside\_pentaacetate; COA\*: (7R)-7-(5-

430 Carboxy-5-oxopentanoyl) aminocephalosporinate; C3CA\*: (3S,5S)-Carbapenam-3-

431 carboxylic\_acid. **b,** Heatmap showcasing the top 20 differential metabolites between

432 the PBS and SynCon3 groups. trans,trans-FP\*: trans,trans-Farnesyl\_phosphate;

433 D4O2E\*: 2,5-Dichloro-4-oxohex-2-enedioate; AM17-(T2H2Y)-5A3\*: 2alpha-

434 Methyl-17beta-[(tetrahydro-2H-pyran-2-yl)oxy]-5alpha-androstan-3-one; 2O9MA\*:

435 2-Oxo-9-methylthiononanoic\_acid; ADD\*: Androstane-3,17-diol\_dipropionate;

436 6A6D\*: 6-Amino-6-deoxyfutasosin; P7R\*: Pinocembrin\_7-rhamnosylglucoside.

437 Differential metabolites are ranked based on fold change.

438

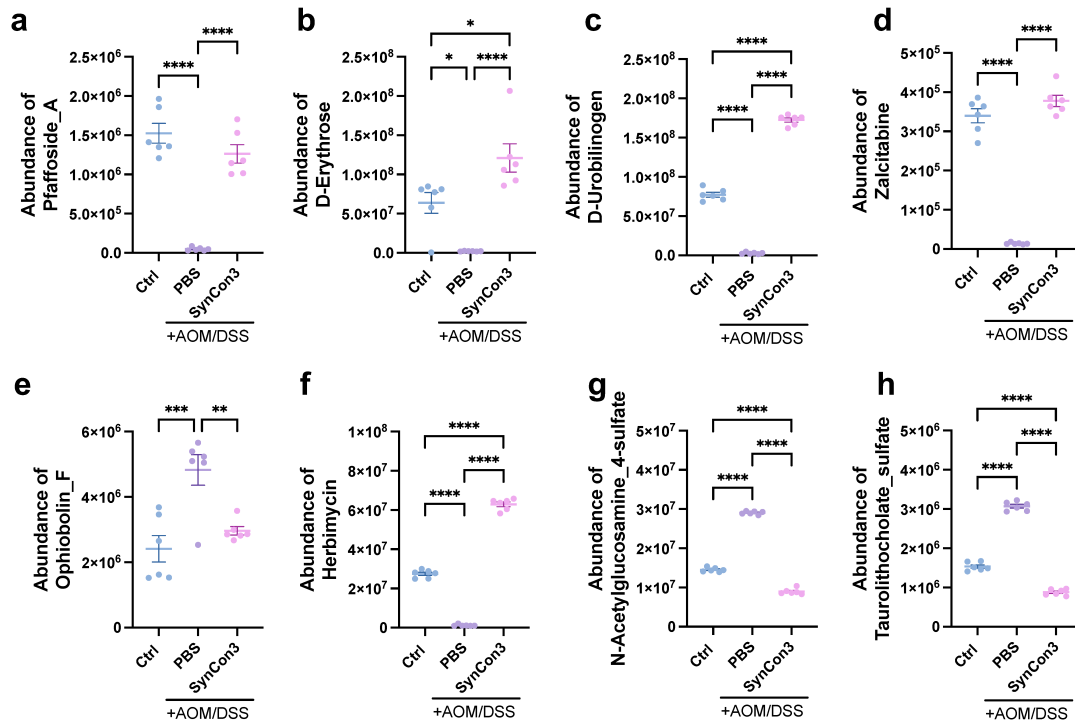

439

440 **Supplemental Figure 35. Effect of AOM/DSS and dietary SynCon3 on fecal**

441 **metabolome composition.** Comparison of the abundance of (a) Pfaffoside A, (b) D-

442 Erythrose, (c) D-Urobilinogen, (d) Zalcitabine, (e) Ophiobolin F, (f) Heterodendrin, (g)

443 N-Acetylglucosamine\_4-sulfate and (h) Tauro lithocholate sulfate in the indicated

444 groups (n = 6, ± s.e.m). Statistical analysis was performed using One-way ANOVA

445 with Tukey post-test (\**p* < 0.05, \*\* *p* < 0.01, \*\*\* *p* < 0.001, and \*\*\*\* *p* < 0.0001).

446

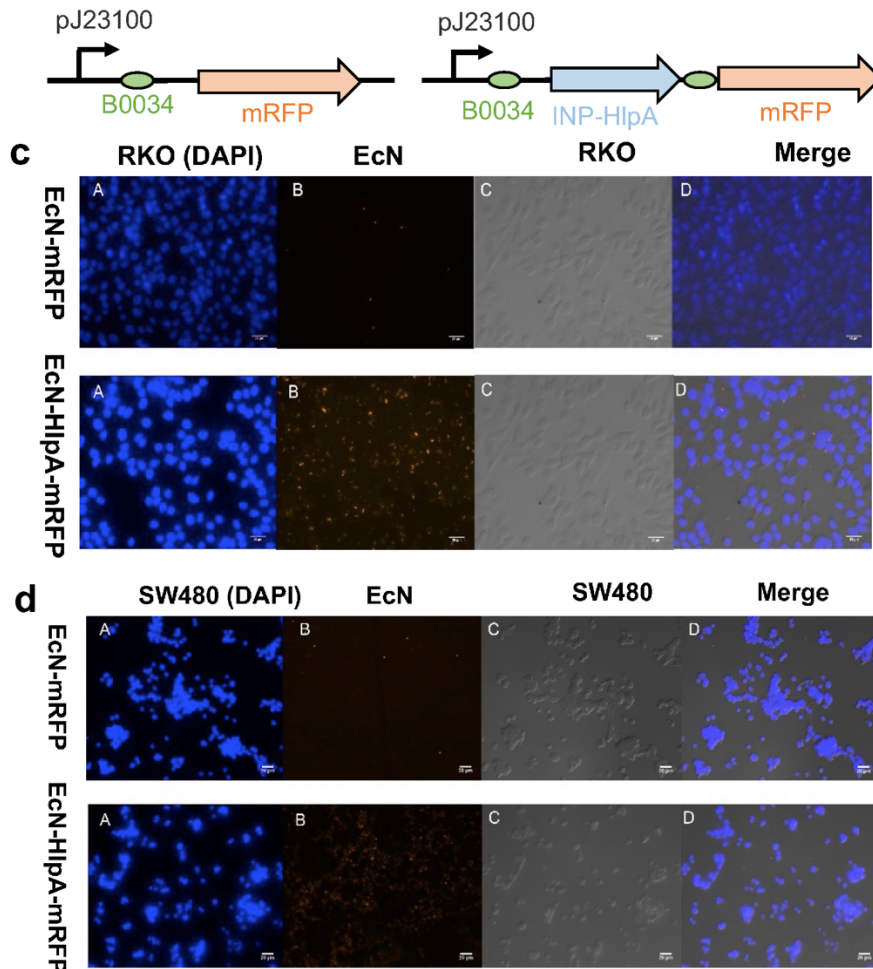

447

448 **Supplemental Figure 36. HlpA enhanced the adhesion effect of EcN on tumor cells.**

449 **a-b**, Schematic diagram of control plasmid (constitutive expression of mRFP) and INP-

450 HlpA integrate plasmid. **c-d**, The adhesion level of modified EcN to RKO cell and

451 SW480 was observed by bacteria red fluorescence. Blue fluorescence represents DAPI-

452 stained CRC cells.

453

### 454 III. Supplemental Tables

455 **Supplemental Table 1.** Linear discriminant analysis effect size between Ctrl and PBS

456 groups after the last DSS administration.

| Biomarker names             | Groups | LDA values |
|-----------------------------|--------|------------|
| <i>Ligilactobacillus</i>    | PBS    | 4.64       |
| <i>Dubosiella</i>           | PBS    | 3.15       |
| <i>Intestinimonas</i>       | PBS    | 3.14       |
| <i>Roseburia</i>            | PBS    | 3.15       |
| <i>Pseudoflavonifractor</i> | PBS    | 3.07       |
| <i>Bacteroides</i>          | PBS    | 4.48       |

|                                      |      |      |
|--------------------------------------|------|------|
| <i>Ruminococcaceae_NK4A214_group</i> | PBS  | 3.05 |
| <i>Parabacteroides</i>               | PBS  | 3.16 |
| <i>Muribaculum</i>                   | PBS  | 3.70 |
| <i>Catenibacterium</i>               | PBS  | 3.01 |
| <i>Parasutterella</i>                | PBS  | 3.25 |
| <i>Paraprevotella</i>                | Ctrl | 3.40 |
| HT002                                | Ctrl | 3.90 |
| <i>Ruminococcus</i>                  | Ctrl | 3.39 |
| <i>Anaerotignum</i>                  | Ctrl | 3.02 |
| <i>Alloprevotella</i>                | Ctrl | 4.24 |
| <i>Incertae_Sedis</i>                | Ctrl | 3.23 |
| <i>Lachnospiraceae_NK4A136_group</i> | Ctrl | 4.05 |
| <i>Desulfovibrio</i>                 | Ctrl | 3.41 |
| <i>Rikenella</i>                     | Ctrl | 3.09 |
| <i>Bifidobacterium</i>               | Ctrl | 3.17 |

457

458 **Supplemental Table 2.** Modified information of recombination plasmids.

| <b>Identifier</b> | <b>Promoter</b>  | <b>Coding gene</b>  | <b>Backbone</b> | <b>Ori</b> | <b>Resistance</b> |
|-------------------|------------------|---------------------|-----------------|------------|-------------------|
| Reporter 1/01     | pLldR variant 1  | <i>mRFP</i>         | pSB1A3          | ColE1      | AmpR              |
| Reporter 1/02     | pLldR variant 2  | <i>mRFP</i>         | pSB1A3          | ColE1      | AmpR              |
| Reporter 1/03     | pLldR variant 3  | <i>mRFP</i>         | pSB1A3          | ColE1      | AmpR              |
| Reporter 1/04     | pLldR variant 4  | <i>mRFP</i>         | pSB1A3          | ColE1      | AmpR              |
| Reporter 1/05     | pLldR variant 5  | <i>mRFP</i>         | pSB1A3          | ColE1      | AmpR              |
| Reporter 1/06     | pLldR variant 6  | <i>mRFP</i>         | pSB1A3          | ColE1      | AmpR              |
| Reporter 1/07     | pLldR variant 7  | <i>mRFP</i>         | pSB1A3          | ColE1      | AmpR              |
| Reporter 1/08     | pLldR variant 8  | <i>mRFP</i>         | pSB1A3          | ColE1      | AmpR              |
| Reporter 1/09     | pLldR variant 9  | <i>mRFP</i>         | pSB1A3          | ColE1      | AmpR              |
| Reporter 1/10     | pLldR variant 10 | <i>mRFP</i>         | pSB1A3          | ColE1      | AmpR              |
| Reporter 2        | pCadC            | <i>mRFP</i>         | pSB1A3          | ColE1      | AmpR              |
| Reporter 3        | pPepT-mRFP       | <i>mRFP</i>         | pSB1A3          | ColE1      | AmpR              |
| Reporter 4        | plac             | <i>luxCDABE</i>     | pSB3T5          | p15A       | TetR              |
| Controller 1      | pLldR-           | <i>TP901</i>        | pSB1A3          | ColE1      | AmpR              |
| Controller 2      | pCadC-TP901      | <i>TP901</i>        | pSB1A3          | ColE1      | AmpR              |
| Controller 3      | pPepT-TP901      | <i>TP901</i>        | pSB1A3          | ColE1      | AmpR              |
| Controller 4      | pLldR            | <i>TP901-φX174E</i> | pSB1A3          | ColE1      | AmpR              |
| Controller 5      | pCadC            | <i>TP901-φX174E</i> | pSB1A3          | ColE1      | AmpR              |
| Controller 6      | pPepT            | <i>TP901-φX174E</i> | pSB1A3          | ColE1      | AmpR              |
| Switch 1          | pP7-XOR gate     | <i>mRFP</i>         | pSB4C5          | pSC101     | CmR               |
| Switch 2          | pP7-XOR gate     | <i>hlyE</i>         | pSB4C5          | pSC101     | CmR               |
| Switch 3          | pP7-XOR gate     | <i>CCL21</i>        | pSB4C5          | pSC101     | CmR               |
| Switch 4          | pP7-XOR gate     | <i>CDD_iRGD</i>     | pSB4C5          | pSC101     | CmR               |
| Test effector 1   | pLldR            | <i>hlyE</i>         | pSB1A3          | ColE1      | AmpR              |

|                 |       |             |        |       |      |
|-----------------|-------|-------------|--------|-------|------|
| Test effector 2 | pCadC | <i>hlyE</i> | pSB1A3 | ColE1 | AmpR |
| Test effector 3 | pPepT | <i>hlyE</i> | pSB1A3 | ColE1 | AmpR |
| Test effector 4 | plac  | <i>hlyE</i> | pSB1A3 | ColE1 | AmpR |

459

460

**Supplemental Table 3.** Bacterial and mammalian stains used in this study.

| Type                | Bacteria/Cell line                        | Harboring plasmid       | Resistance |
|---------------------|-------------------------------------------|-------------------------|------------|
| Control             | <i>Escherichia coli</i> Nissle 1917 (EcN) | N/A                     | N/A        |
| Biosensor Strains   | EcN B1/01                                 | Reporter 1/01           | AmpR       |
|                     | EcN B1/02                                 | Reporter 1/02           | AmpR       |
|                     | EcN B1/03                                 | Reporter 1/03           | AmpR       |
|                     | EcN B1/04                                 | Reporter 1/04           | AmpR       |
|                     | EcN B1/05                                 | Reporter 1/05           | AmpR       |
|                     | EcN B1/06                                 | Reporter 1/06           | AmpR       |
|                     | EcN B1/07                                 | Reporter 1/07           | AmpR       |
|                     | EcN B1/08                                 | Reporter 1/08           | AmpR       |
|                     | EcN B1/09                                 | Reporter 1/09           | AmpR       |
|                     | EcN B1/10                                 | Reporter 1/10           | AmpR       |
|                     | EcN B2/01                                 | Reporter 2              | AmpR       |
|                     | EcN B3/01                                 | Reporter 3              | AmpR       |
|                     | EcN B1/11                                 | Controller 1 + Switch 1 | AmpR+CmR   |
|                     | EcN B2/02                                 | Controller 2 + Switch 1 | AmpR+CmR   |
|                     | EcN B3/02                                 | Controller 3 + Switch 1 | AmpR+CmR   |
|                     | EcN B1/12                                 | Controller 4 + Switch 1 | AmpR+CmR   |
|                     | EcN B2/03                                 | Controller 5 + Switch 1 | AmpR+CmR   |
|                     | EcN B3/03                                 | Controller 6 + Switch 1 | AmpR+CmR   |
| Therapeutic strains | EcN T4                                    | Test effector 4         | AmpR       |
|                     | EcN T1/01                                 | Test effector 1         | AmpR       |
|                     | EcN T2/01                                 | Test effector 2         | AmpR       |
|                     | EcN T3/01                                 | Test effector 3         | AmpR       |
|                     | EcN T1/02                                 | Controller 1 + Switch 2 | AmpR+CmR   |
|                     | EcN T2/02                                 | Controller 2 + Switch 2 | AmpR+CmR   |
|                     | EcN T3/02                                 | Controller 3 + Switch 2 | AmpR+CmR   |
|                     | EcN T1/03                                 | Controller 4 + Switch 2 | AmpR+CmR   |
|                     | EcN T2/03                                 | Controller 4 + Switch 2 | AmpR+CmR   |
|                     | EcN T3/03                                 | Controller 4 + Switch 2 | AmpR+CmR   |
|                     | EcN T1/04                                 | Controller 4 + Switch 3 | AmpR+CmR   |
|                     | EcN T1/05                                 | Controller 4 + Switch 4 | AmpR+CmR   |
|                     | Mouse colorectal carcinoma CT26           | N/A                     | N/A        |
|                     | Human colorectal carcinoma RKO            | N/A                     | N/A        |
|                     | Human colorectal carcinoma SW480          | N/A                     | N/A        |



461 **Note:** EcN B1/01-12, EcN B2/01-03, and EcN B3/01-03 denote biosensor strains  
 462 regulated by pLldR, pCadC, and pPepT, correspondingly. Similarly, EcN T1/01-05,  
 463 EcN T2/01-03, and EcN T3/01-03 encompass therapeutic strains under the control of  
 464 pLldR, pCadC, and pPepT, respectively.

465

466 **Supplemental Table 4. Synthetic microbiome used in this study.**

| Label   | Bacteria member                 | Population ratio |
|---------|---------------------------------|------------------|
| SynCon1 | EcN T1/01; EcN T2/01; EcN T3/01 | 1:1:1            |
| SynCon2 | EcN T1/02; EcN T2/02; EcN T3/02 | 1:1:1            |
| SynCon3 | EcN T1/03; EcN T2/03; EcN T3/03 | 1:1:1            |

467

468 **Supplemental Table 5. Primers for qPCR.**

| Target                 | Primers  | Sequence                     | Product size |
|------------------------|----------|------------------------------|--------------|
| Total                  | Tot.F    | GCAGGCCTAACACATGCAAGTC       | 340 bp       |
| bacteria <sup>13</sup> | Tot.R    | CTGCTGCCTCCCGTAGGAGT         |              |
| EcN <sup>14</sup>      | Muta9    | GCGAGGTAACCTCGAACATG         | 313 bp       |
|                        | Muta10   | CGGCGTATCGATAATTCACG         |              |
| pLldR                  | pLldR.qF | TCTTCGCTTATCTGACCTCTGG       | 162 bp       |
|                        | pLldR.qR | AGTCTGTTGTCATCTCCTTGT        |              |
| pCadC                  | pCadC.qF | GTAATCTTATCGCCAGTTTGGTCTGGTC | 89 bp        |
|                        | pCadC.qR | AAAATGAAATTAGGAGAAGAG        |              |
| pPepT                  | pPepT.qF | GCAGGGGTAAAAGTGACC           | 81 bp        |
|                        | pPepT.qR | CGAAAAGTGAGGGTGACTGC         |              |
| pSB1A3 ori             | 1A3.qF   | GCTCACGCTGTAGGTATC           | 182 bp       |
|                        | 1A3.qR   | CGCTCTGCTAATCCTGTTA          |              |
| pSB4C5 ori             | 4C5.qF   | TACATCAGATTCTACCTACG         | 139 bp       |
|                        | 4C5.qR   | TGAGAACGAACCATTGAGAT         |              |

469

470 **Supplemental Table 6. Primers for qRT-PCR<sup>15,16</sup>.**

| Target gene | Forward primer (5'→3') | Reverse primer (5'→3')   |
|-------------|------------------------|--------------------------|
| GAPDH       | GACGGCCGCATCTTCTTGT    | CAGTGCCAGCCTCGTCCCGTACAA |

|                  |                           |                           |
|------------------|---------------------------|---------------------------|
| p53              | CCCCTGTCATCTTTTGTCCCT     | AGCTGGCAGAATAGCTTATTGAG   |
| Bax              | AGACAGGGGCCTTTTTGCTAC     | AATTCGCCGGAGACTCG         |
| Bcl-2            | GCTACCGTCGTGACTTCGC       | CCCCACCGAACTCAAAGAAGG     |
| $\beta$ -catenin | TCTCCTTGCTGGCCTTTCTA      | GTCACACAGCCCTGTCAAGA      |
| NF- $\kappa$ B   | AGCTGATGTGCATCGGCAAGTG    | GTAGCTGCATGGAGACTCGAACAG  |
| TNF- $\alpha$    | CTGAACTTCGGGGTGATCGG      | GGCTTGCTACTCGAATTTTGAGA   |
| IL-1 $\beta$     | CAACCAACAAGTGATATTCTCCATG | GATCCACACTCTCCAGCTGCA     |
| IL-6             | AAGTCGGAGGCTTAATTACACATGT | CCATTGCACAACCTCTTTTCTCATT |
| IL-4             | GGTCTCAACCCCCAGCTAGT      | GCCGATGATCTCTCTCAAGTGAT   |
| IL-10            | CTTACTGACTGGCATGAGGATCA   | GCAGCTCTAGGAGCATGTGG      |
| MUC2             | ATGCCACCTCCTCAAAGAC       | GTAGTTTCCGTTGGAACAGTGAA   |
| TFF3             | TAATGCTGTTGGTGGTCCTG      | CAGCCACGGTTGTTACTCTG      |
| Occludin         | TCTGCTTCATCGCTTCCTTAG     | GTCGGGTTCACTCCCATTA       |
| ZO-1             | AGGACACCAAAGCATGTGAG      | GGCATTCTGCTGGTTACA        |

471

#### 472 IV. Supplementary References

- 473 1 Courbet, A., Endy, D., Renard, E., Molina, F. & Bonnet, J. Detection of  
474 pathological biomarkers in human clinical samples via amplifying genetic  
475 switches and logic gates. *Sci Transl Med* **7**, 289ra283,  
476 doi:10.1126/scitranslmed.aaa3601 (2015).
- 477 2 Goers, L. *et al.* Whole-cell Escherichia coli lactate biosensor for monitoring  
478 mammalian cell cultures during biopharmaceutical production. *Biotechnol*  
479 *Bioeng* **114**, 1290-1300, doi:10.1002/bit.26254 (2017).
- 480 3 Lee, Y. H., Kim, J. H., Bang, I. S. & Park, Y. K. The membrane-bound  
481 transcriptional regulator CadC is activated by proteolytic cleavage in response  
482 to acid stress. *J Bacteriol* **190**, 5120-5126, doi:10.1128/jb.00012-08 (2008).
- 483 4 Crack, J. C. *et al.* Signal perception by FNR: the role of the iron-sulfur cluster.  
484 *Biochem Soc Trans* **36**, 1144-1148, doi:10.1042/bst0361144 (2008).
- 485 5 Stricker, J. *et al.* A fast, robust and tunable synthetic gene oscillator. *Nature*  
486 **456**, 516-519, doi:10.1038/nature07389 (2008).
- 487 6 Chen, Y., Kim, J. K., Hirning, A. J., Josić, K. & Bennett, M. R. SYNTHETIC  
488 BIOLOGY. Emergent genetic oscillations in a synthetic microbial consortium.  
489 *Science* **349**, 986-989, doi:10.1126/science.aaa3794 (2015).
- 490 7 Bonyadi, M. R. & Michalewicz, Z. Particle Swarm Optimization for Single  
491 Objective Continuous Space Problems: A Review. *Evol Comput* **25**, 1-54,  
492 doi:10.1162/EVCO\_r\_00180 (2017).
- 493 8 Din, M. O. *et al.* Synchronized cycles of bacterial lysis for in vivo delivery.  
494 *Nature* **536**, 81-85, doi:10.1038/nature18930 (2016).
- 495 9 Chien, T. *et al.* Enhancing the tropism of bacteria via genetically programmed  
496 biosensors. *Nat Biomed Eng* **6**, 94-104, doi:10.1038/s41551-021-00772-3  
497 (2022).

- 498 10 Lou, C., Stanton, B., Chen, Y. J., Munsky, B. & Voigt, C. A. Ribozyme-based  
499 insulator parts buffer synthetic circuits from genetic context. *Nat Biotechnol*  
500 **30**, 1137-1142, doi:10.1038/nbt.2401 (2012).
- 501 11 Yu, H. *et al.* A method for Absolute Protein Expression Quantity  
502 Measurement Employing Insulator RiboJ. *Engineering* **4**, 881-887,  
503 doi:<https://doi.org/10.1016/j.eng.2018.09.012> (2018).
- 504 12 Mutalik, V. K. *et al.* Precise and reliable gene expression via standard  
505 transcription and translation initiation elements. *Nat Methods* **10**, 354-360,  
506 doi:10.1038/nmeth.2404 (2013).
- 507 13 Castillo, M. *et al.* Quantification of total bacteria, enterobacteria and  
508 lactobacilli populations in pig digesta by real-time PCR. *Vet Microbiol* **114**,  
509 165-170, doi:10.1016/j.vetmic.2005.11.055 (2006).
- 510 14 Blum-Oehler, G. *et al.* Development of strain-specific PCR reactions for the  
511 detection of the probiotic *Escherichia coli* strain Nissle 1917 in fecal samples.  
512 *Research in Microbiology* **154**, 59-66, doi:[https://doi.org/10.1016/S0923-](https://doi.org/10.1016/S0923-2508(02)00007-4)  
513 [2508\(02\)00007-4](https://doi.org/10.1016/S0923-2508(02)00007-4) (2003).
- 514 15 Oh, N. S., Lee, J. Y., Kim, Y. T., Kim, S. H. & Lee, J. H. Cancer-protective  
515 effect of a synbiotic combination between *Lactobacillus gasseri* 505 and a  
516 *Cudrania tricuspidata* leaf extract on colitis-associated colorectal cancer. *Gut*  
517 *Microbes* **12**, 1785803, doi:10.1080/19490976.2020.1785803 (2020).
- 518 16 Wang, T. *et al.* *Lactobacillus coryniformis* MXJ32 administration ameliorates  
519 azoxymethane/dextran sulfate sodium-induced colitis-associated colorectal  
520 cancer via reshaping intestinal microenvironment and alleviating  
521 inflammatory response. *Eur J Nutr* **61**, 85-99, doi:10.1007/s00394-021-02627-  
522 8 (2022).
- 523
